# Supplementary material for: Keloid pathogenesis and fibroproliferative properties are dependent on stem cells regulated by the HEDGEHOG-GLI1 pathway
Source: Research Square preprint supplement (doi:10.21203/rs.3.rs-2515946/v1), 2023-05-23
Supplement: Supplementary file 1 [file 4e47ce050370ac8999cc1917.xlsx]

## Sheet: Figure 2a, b
Patient: K1
	GLI1	ACTB	ΔΔCT			GLI2	ACTB	ΔΔCT			GLI3	ACTB	ΔΔCT
Normal F	36.0296	21.3023	3.68675e-05		Normal F	30.4972	18.639	0.000269362		Normal F	27.0533	18.639	0.0029313
	35.4914	21.2785	5.26596e-05			30.815	18.8668	0.000253077			27.114	18.8668	0.0032912
	36.0727	20.7036	2.36286e-05			30.451	18.7223	0.000294648			27.0309	18.7223	0.00315396
Keloid Normal F	35.076	20.2578	3.46162e-05		Keloid Normal F	30.5966	18.7436	0.000270331		Keloid Normal F	28.6239	18.7436	0.00106106
	35.0686	20.1063	3.13244e-05			30.4071	18.6097	0.000280947			28.6043	18.6097	0.000980227
	34.2638	20.6606	8.03579e-05			30.4626	18.5699	0.000262979			28.6899	18.5699	0.000898621
Keloid Peripheral F	36.0608	20.6511	2.29731e-05		Keloid Peripheral F	31.9331	19.1582	0.00014268		Keloid Peripheral F	28.1339	19.1582	0.00198617
	36.6549	20.2902	1.18505e-05			31.6329	19.3503	0.000200723			28.2383	19.3503	0.0021109
	36.475	20.9797	2.165e-05			31.5279	19.0291	0.000172771			27.8922	19.0291	0.00214756
Keloid Center F	35.5152	19.2998	1.31427e-05		Keloid Center F	31.0617	18.426	0.000157131		Keloid Center F	28.5653	18.426	0.00088664
	34.5374	19.3207	2.62618e-05			31.2608	18.5785	0.000152141			28.7629	18.5785	0.000859429
	34.7596	19.3498	2.29718e-05			31.1658	18.6114	0.000166245			28.6672	18.6114	0.000939497
Normal S	35.0426	20.8422	5.31186e-05		Normal S	30.4001	20.8937	0.001375		Normal S	25.9159	20.8937	0.0307731
	35.9921	20.8754	2.81471e-05			30.172	20.8026	0.0015119			26.2177	20.8026	0.0234362
	35.9562	20.9079	2.95124e-05			31.0634	20.9658	0.00091266			25.6868	20.9658	0.0379162
Keloid Normal S	34.2638	21.4187	0.000135905		Keloid Normal S	30.8145	21.1939	0.00127035		Keloid Normal S	27.5182	21.1939	0.0124797
	34.172	21.3121	0.000134521			30.9283	21.358	0.0013154			27.5962	21.358	0.0132474
	34.525	21.3247	0.000106245			30.8696	21.2221	0.00124686			27.4272	21.2221	0.0135538
Keloid Peripheral S	32.5638	20.952	0.00031954		Keloid Peripheral S	30.7235	21.1797	0.00133973		Keloid Peripheral S	27.2628	21.1797	0.0147504
	32.5685	20.9057	0.000308416			30.8409	21.4778	0.00151852			27.3962	21.4778	0.0165344
	32.5561	21.0476	0.000343243			30.3269	21.0568	0.00161968			27.1606	21.0568	0.0145402
Keloid Center S	33.9861	21.4995	0.000174242		Keloid Center S	30.7943	19.6171	0.00043185		Keloid Center S	27.7441	19.6171	0.00357713
	34.199	21.4678	0.000147076			30.7294	19.7485	0.000494786			27.6591	19.7485	0.0041559
	33.8058	21.323	0.000174704			30.732	19.9356	0.000562275			27.7706	19.9356	0.00437952
					GLI1
	GLI1	GLI2	GLI3		Keloid Fibroblasts-Keloid sphere
Relative expression					t-Test: Two-tailed test
Normal F	1	1	1
Keloid Normal F	0.874113	0.996534	0.313541			#1	#2
Keloid Peripheral F	0.499079	0.631724	0.66599		Average	2.94609e-05	0.000204877
Keloid Center F	0.551242	0.581964	0.286416		Variance	4.19051e-10	8.45479e-09
Normal S	0.978988	4.65013	9.82519		Number of observation	9	9
Keloid Normal S	3.32879	4.69056	4.1893		Difference from statistical hypothesis average	0
Keloid Peripheral S	8.58284	5.48036	4.88724		Degree of freedom	9
Keloid Center S	4.38353	1.82222	1.2918		t	-5.58643
					P(T<=t) One-tail	0.000170067
S.D.					t boundary value One-tail	1.83311
Normal F	0.385332	0.0769095	0.0581134		P(T<=t) Two-tail	0.000340134
Keloid Normal F	0.0617106	0.0331661	0.0259856		t boundary value One-tail	2.26216
Keloid Peripheral F	0.161083	0.106579	0.0270683
Keloid Center F	0.180966	0.026258	0.013026		GLI1
Normal S	0.372224	1.15289	2.3165		Normal S-Keloid Normal S				Normal S-Keloid Peripheral S				Normal S-Keloid Center S
Keloid Normal S	0.443785	0.12788	0.177029		t-Test: Two-tailed test				t-Test: Two-tailed test				t-Test: Two-tailed test
Keloid Peripheral S	0.471593	0.520483	0.350571
Keloid Center S	0.419405	0.239482	0.132486			#1	#2			#1	#2			#1	#2
					Average	3.6926e-05	0.000125557		Average	3.6926e-05	0.000323733		平均	3.6926e-05	0.000165341
					Variance	1.97115e-10	2.80194e-10		Variance	1.97115e-10	3.16416e-10		分散	1.97115e-10	2.50252e-10
					Number of observation	3	3		Number of observation	3	3		観測数	3	3
					Difference from statistical hypothesis average	0			Difference from statistical hypothesis average	0			仮説平均との差異	0
					Degree of freedom	4			Degree of freedom	4			自由度	4
					t	-7.02662			t	-21.9213			t	-10.5158
					P(T<=t) One-tail	0.00108058			P(T<=t) One-tail	1.28131e-05			P(T<=t) 片側	0.000231212
					t boundary value One-tail	2.13185			t boundary value One-tail	2.13185			t 境界値 片側	2.13185
					P(T<=t) Two-tail	0.00216117			P(T<=t) Two-tail	2.56261e-05			P(T<=t) 両側	0.000462424
					t boundary value One-tail	2.77645			t boundary value One-tail	2.77645			t 境界値 両側	2.77645

## Sheet: Figure 2c
GLI1
Relative Expression					average ΔΔCT
Patient #	Keloid Normal	Keloid Peripheral	Keloid Center		Patient #	Normal	Keloid Normal	Keloid Peripheral	Keloid Center
K1	7.43023	9.1024	10.952		K1	3.61272e-05	0.000268433	0.000328844	0.000395667
K2	50.5847	56.5057	45.4167		K2	1.57234e-05	0.000795366	0.000888464	0.000714107
K4	29.0183	62.4525	28.0065		K4	4.44065e-05	0.0012886	0.0027733	0.00124367
K5	14.632	11.8905	17.8443		K5	2.01215e-05	0.000294419	0.000239255	0.000359055
K6	8.63434	21.3899	13.1531		K6	7.00065e-05	0.00060446	0.00149743	0.000920804
K8	15.6735	7.61749	12.6719		K8	7.66273e-05	0.00120102	0.000583708	0.000971013
	Relative expression
	Box Plot	Keloid Normal Sphere	Keloid Peripheral Sphere	Keloid Center Sphere
	Max	50.5847	62.4525	45.4167
	0.75	32.1996	33.1842	20.3848
	Center	18.3587	20.3554	13.5611
	0.25	13.1326	11.1935	13.0328
	Min	7.43023	7.61749	10.952
		Keloid Normal Sphere	Keloid Peripheral Sphere	Keloid Center Sphere
	Max-75	18.3852	29.2684	25.0319
	75-Center	13.8409	12.8287	6.82374
	Center-25	5.2261	9.16194	0.528292
	0.25	13.1326	11.1935	13.0328
	25-Min	5.70236	3.57597	2.08077
	Normal S-Keloid Normal S				Normal S-Keloid Peripheral S				Normal S-Keloid Center S
	t-Test: Two-tailed test				t-Test: Two-tailed test				t-Test: Two-tailed test
		変数 1	変数 2			変数 1	変数 2			変数 1	変数 2
	Average	4.38354e-05	0.00074205		Average	4.38354e-05	0.00105183		Average	4.38354e-05	0.000767386
	Variance	6.34522e-10	1.91166e-07		Variance	6.34522e-10	9.18163e-07		Variance	6.34522e-10	1.19919e-07
	Number of observation	6	6		Number of observation	6	6		Number of observation	6	6
	Difference from statistical hypothesis average	0			Difference from statistical hypothesis average	0			Difference from statistical hypothesis average	0
	Degree of freedom	5			Degree of freedom	5			Degree of freedom	5
	t	-3.90516			t	-2.57588			t	-5.10451
	P(T<=t) One-tail	0.00567505			P(T<=t) One-tail	0.0248399			P(T<=t) One-tail	0.00187791
	t boundary value One-tail	2.01505			t boundary value One-tail	2.01505			t boundary value One-tail	2.01505
	P(T<=t) Two-tail	0.0113501			P(T<=t) Two-tail	0.0496799			P(T<=t) Two-tail	0.00375583
	t boundary value One-tail	2.57058			t boundary value One-tail	2.57058			t boundary value One-tail	2.57058

## Sheet: Figure 2e
K2												Normal Dermis	Keloid Normal	Keloid Peripheral	Keloid Center			Normal Dermis	Keloid Normal	Keloid Peripheral	Keloid Center
KN				KP			KC				N1	0	-	-	-		Average	0	0.191743	0.431449	0.181999
	GLI1-OCT4 double positive	Cells		GLI1-OCT4 double positive	Cells		GLI1-OCT4 double positive	Cells			N2	0	-	-	-		S.D.	0	0.147741	0.237896	0.16804
1	0	190		1	225		0	182			N3	0	-	-	-
2	0	149		1	170		1	351			K2	-	0	0.273973	0.0878735
3	0	98		0	185		0	190			K3	-	0.133511	0.306091	0.208855
4	-	-		1	207		0	415			K4	-	0.286533	0.847059	0.464846
5	-	-		0	308		-	-			K5	-	0.155039	0.318598	0.0822368
SUM	0	437		3	1095		1	1138			K6	-	0.383632	0.411523	0.0661813
%	0			0.273973			0.0878735					Normal Dermis	Keloid Normal	Keloid Peripheral	Keloid Center
												0	0.191743	0.431449	0.181999
K3
KN				KP			KC
	GLI1-OCT4 double positive	Cells		GLI1-OCT4 double positive	Cells		GLI1-OCT4 double positive	Cells			t-Test: Two-tailed test				t-Test: Two-tailed test				t-Test: Two-tailed test
1	2	314		3	552		1	681			NvsKN				NvsKP				NvsKC
2	0	414		1	577		0	757				#1	#2			#1	#2			#1	#2
3	0	655		4	774		2	728			Average	0	0.191743		Average	0	0.431449		Average	0	0.181999
4	0	115		1	684		0	53			Variance	0	0.0218275		Variance	0	0.0565943		Variance	0	0.0282374
5	-	-		1	680		2	175			Number of observation	3	5		Number of observation	3	5		Number of observation	3	5
SUM	2	1498		10	3267		5	2394			Difference from statistical hypothesis average	0			Difference from statistical hypothesis average	0			Difference from statistical hypothesis average	0
%	0.133511			0.306091			0.208855				Degree of freedom	4			Degree of freedom	4			Degree of freedom	4
											t	-2.90203			t	-4.05534			t	-2.42181
K4											P(T<=t) One-tail	0.022014			P(T<=t) One-tail	0.00770384			P(T<=t) One-tail	0.0363102
KN				KP			KC				t boundary value One-tail	2.13185			t boundary value One-tail	2.13185			t boundary value One-tail	2.13185
	GLI1-OCT4 double positive	Cells		GLI1-OCT4 double positive	Cells		GLI1-OCT4 double positive	Cells			P(T<=t) Two-tail	0.044028			P(T<=t) Two-tail	0.0154077			P(T<=t) Two-tail	0.0726204
1	2	362		4	426		3	244			t boundary value One-tail	2.77645			t boundary value One-tail	2.77645			t boundary value One-tail	2.77645
2	0	143		5	422		1	431
3	0	127		3	333		2	387
4	0	66		4	465		2	326
5	-	-		2	479		0	333
SUM	2	698		18	2125		8	1721
%	0.286533			0.847059			0.464846
K5
KN				KP			KC
	GLI1-OCT4 double positive	Cells		GLI1-OCT4 double positive	Cells		GLI1-OCT4 double positive	Cells
1	0	117		0	420		0	651
2	0	172		2	542		0	515
3	1	193		1	508		1	465
4	0	86		1	454		0	436
5	0	77		4	587		1	365
SUM	1	645		8	2511		2	2432
%	0.155039			0.318598			0.0822368
K6
KN				KP			KC
	GLI1-OCT4 double positive	Cells		GLI1-OCT4 double positive	Cells		GLI1-OCT4 double positive	Cells
1	0	158		1	309		1	252
2	0	193		1	270		0	299
3	1	152		2	368		0	307
4	1	175		2	531		0	261
5	1	104		2	466		0	392
SUM	3	782		8	1944		1	1511
%	0.383632			0.411523			0.0661813
N1
	GLI1-OCT4 double positive	Cells
1	0	117
2	0	81
3	0	124
4	0	144
5	0	80
SUM	0	546
%	0
N2
	GLI1-OCT4 double positive	Cells
1	0	78
2	0	134
3	0	51
4	0	126
5	0	62
SUM	0	451
%	0
N3
	GLI1-OCT4 double positive	Cells
1	0	55
2	0	64
3	0	88
4	0	69
5	-	-
SUM	0	276
%	0

## Sheet: Figure 2g
K2												Normal Dermis	Keloid Normal	Keloid Peripheral	Keloid Center			Normal Dermis	Keloid Normal	Keloid Peripheral	Keloid Center
KN				KP			KC				N1	0	-	-	-		Average	0	0.0620637	0.236313	0.311072
	GLI1-NANOG double positive	Cells		GLI1-NANOG double positive	Cells		GLI1-NANOG double positive	Cells			N2	0	-	-	-		S.D.	0	0.0849842	0.10754	0.136931
1	0	111		1	382		1	275			N3	0	-	-	-
2	0	147		0	365		1	141			K2	-	0.15528	0.133869	0.390244
3	0	75		-	-		2	280			K3	-	0	0.195848	0.235929
4	0	135		-	-		0	179			K4	-	0	0.182039	0.436681
5	1	176		-	-		0	150			K5	-	0	0.258287	0.106781
SUM	1	644		1	747		4	1025			K6	-	0.155039	0.411523	0.385728
%	0.15528			0.133869			0.390244					Normal Dermis	Keloid Normal	Keloid Peripheral	Keloid Center
											Average %	0	0.0620637	0.236313	0.311072
K3
KN				KP			KC				t-Test: Two-tailed test				t-Test: Two-tailed test				t-Test: Two-tailed test
	GLI1-NANOG double positive	Cells		GLI1-NANOG double positive	Cells		GLI1-NANOG double positive	Cells
1	0	289		2	334		1	666				#1	#2			#1	#2			#1	#2
2	0	600		1	657		2	706			Average	0	0.0620637		Average	0	0.236313		Average	0	0.311072
3	0	416		0	615		2	660			Variance	0	0.00722231		Variance	0	0.0115648		Variance	0	0.0187502
4	0	575		1	622		1	271			Number of observation	3	5		Number of observation	3	5		Number of observation	3	5
5	-	-		1	325		1	664			Difference from statistical hypothesis average	0			Difference from statistical hypothesis average	0			Difference from statistical hypothesis average	0
SUM	0	1880		5	2553		7	2967			Degree of freedom	4			Degree of freedom	4			Degree of freedom	4
%	0			0.195848			0.235929				t	-1.63299			t	-4.91364			t	-5.07976
											P(T<=t) One-tail	0.088904			P(T<=t) One-tail	0.0039828			P(T<=t) One-tail	0.00354096
K4											t boundary value One-tail	2.13185			t boundary value One-tail	2.13185			t boundary value One-tail	2.13185
KN				KP			KC				P(T<=t) Two-tail	0.177808			P(T<=t) Two-tail	0.0079656			P(T<=t) Two-tail	0.00708191
	GLI1-NANOG double positive	Cells		GLI1-NANOG double positive	Cells		GLI1-NANOG double positive	Cells			t boundary value One-tail	2.77645			t boundary value One-tail	2.77645			t boundary value One-tail	2.77645
1	0	165		1	269		1	320
2	0	109		0	275		0	273			t-Test: Two-tailed test				t-Test: Two-tailed test
3	0	142		1	251		1	372
4	0	30		0	463		5	300				#1	#2			#1	#2
5	-	-		1	390		0	338			Average	0.0620637	0.236313		Average	0.0620637	0.311072
SUM	0	446		3	1648		7	1603			Variance	0.00722231	0.0115648		Variance	0.00722231	0.0187502
%	0			0.182039			0.436681				Number of observation	5	5		Number of observation	5	5
											Difference from statistical hypothesis average	0			Difference from statistical hypothesis average	0
K5											Degree of freedom	8			Degree of freedom	7
KN				KP			KC				t	-2.84267			t	-3.45496
	GLI1-NANOG double positive	Cells		GLI1-NANOG double positive	Cells		GLI1-NANOG double positive	Cells			P(T<=t) One-tail	0.0108613			P(T<=t) One-tail	0.00530991
1	0	92		2	305		1	161			t boundary value One-tail	1.85955			t boundary value One-tail	1.89458
2	0	85		1	439		0	431			P(T<=t) Two-tail	0.0217226			P(T<=t) Two-tail	0.0106198
3	0	76		2	446		1	587			t boundary value One-tail	2.306			t boundary value One-tail	2.36462
4	0	104		0	507		0	343
5	0	146		1	626		0	351
SUM	0	503		6	2323		2	1873
%	0			0.258287			0.106781
K6
KN				KP			KC
	GLI1-NANOG double positive	Cells		GLI1-NANOG double positive	Cells		GLI1-NANOG double positive	Cells
1	0	117		1	309		0	423
2	0	172		1	270		1	96
3	1	193		2	368		1	248
4	0	86		2	531		1	123
5	0	77		2	466		1	147
SUM	1	645		8	1944		4	1037
%	0.155039			0.411523			0.385728
N1
	GLI1-NANOG double positive	Cells
1	0	60
2	0	180
3	0	78
4	0	57
5	0	75
SUM	0	450
%	0
N2
	GLI1-NANOG double positive	Cells
1	0	101
2	0	68
3	0	83
4	0	152
5	0	110
SUM	0	514
%	0
N3
	GLI1-NANOG double positive	Cells
1	0	74
2	0	53
3	0	67
4	0	95
5	-	-
SUM	0	289
%	0

## Sheet: Figure 3d
SHH positive area
	KN1	KN2	KN3	KN4	KN6	KN9	KP1	KP2	KP3	KP4	KP6	KP9	KC1	KC2	KC3	KC4	KC6	KC9	Scar2	Scar3	Normal
Total pixels	85720	242104	82918	286225	146975	87210	473717	584162	355386	327109	530337	276723	1429180	539010	1822927	1753069	1705095	632914	1749791	532692	1212756
SHH positive pixels	10744	103173	11597	54500	20023	5339	195067	66700	94717	45629	404260	46280	296783	467382	264079	176509	148095	81601	126867	10810	46976
Total Area	0.423309	1.19558	0.409472	1.41346	0.725802	0.430667	2.33934	2.88475	1.75499	1.61535	8.42022	1.36653	7.05768	2.66178	9.00211	8.65713	8.42022	3.1255	8.64094	2.63058	5.98892
SHH positive area	0.0530568	0.509496	0.0572691	0.269136	0.098879	0.0263654	0.963294	0.329383	0.467738	0.225328	1.99635	0.228543	1.4656	2.30806	1.30409	0.871649	0.731333	0.402968	0.626504	0.0533827	0.23198
Positive	12.5338	42.6152	13.9861	19.041	13.6234	6.122	41.178	11.4181	26.6519	13.9492	23.7089	16.7243	20.766	86.7112	14.4865	10.0686	8.68544	12.8929	7.25041	2.02932	3.87349
50625	pixels	=	0.25	mm^2
1	pixel	=	4.93827e-06	mm^2
		Normal	KN	KP	KC			Normal	KN	KP	KC
		7.25041	12.5338	41.178	20.766		Max	7.25041	19.041	41.178	20.766
		2.02932	13.9861	26.6519	14.4865		0.75	5.56195	13.9861	26.6519	14.4865
		3.87349	19.041	13.9492	10.0686		Center	3.87349	13.6234	23.7089	12.8929
			13.6234	23.7089	8.68544		0.25	2.9514	12.5338	16.7243	10.0686
			6.122	16.7243	12.8929		Min	2.02932	6.122	13.9492	8.68544
			42.6152	11.4181	86.7112
								Normal / Scar	KN	KP	KC
							Max-75	1.68846	5.05486	14.5261	6.27943
							75-Center	1.68846	0.362701	2.94292	1.59363
							Center-25	0.922088	1.08957	6.98464	2.82433
							25%	2.9514	12.5338	16.7243	10.0686
							25-Min	0.922088	6.41183	2.77513	1.38313
t-Test: Two-tailed test				t-Test: Two-tailed test				t-Test: Two-tailed test
NvsKN				NvsKP				NvsKC
	#1	#2			#1	#2			#1	#2
Average	4.38441	13.0613		Average	4.38441	24.4424		Average	4.38441	13.3799
Variance	7.01073	21.3399		Variance	7.01073	113.794		Variance	7.01073	22.2547
Number of observation	3	5		Number of observation	3	5		Number of observation	3	5
Difference from statistical hypothesis average	0			Difference from statistical hypothesis average	0			Difference from statistical hypothesis average	0
Degree of freedom	6			Degree of freedom	5			Degree of freedom	6
t	-3.37621			t	-4.00395			t	-3.4527
P(T<=t) One-tail	0.00746373			P(T<=t) One-tail	0.00514149			P(T<=t) One-tail	0.00679404
t boundary value One-tail	1.94318			t boundary value One-tail	2.01505			t boundary value One-tail	1.94318
P(T<=t) Two-tail	0.0149275			P(T<=t) Two-tail	0.010283			P(T<=t) Two-tail	0.0135881
t boundary value One-tail	2.44691			t boundary value One-tail	2.57058			t boundary value One-tail	2.44691
t-Test: Two-tailed test				t-Test: Two-tailed test				t-Test: Two-tailed test
KNvsKP				KNvsKC				KPvsKC
	#1	#2			#1	#2			#1	#2
Average	13.0613	24.4424		Average	13.0613	13.3799		Average	24.4424	13.3799
Variance	21.3399	113.794		Variance	21.3399	22.2547		Variance	113.794	22.2547
Number of observation	5	5		Number of observation	5	5		Number of observation	5	5
Difference from statistical hypothesis average	0			Difference from statistical hypothesis average	0			Difference from statistical hypothesis average	0
Degree of freedom	5			Degree of freedom	8			Degree of freedom	6
t	-2.18923			t	-0.107905			t	2.12077
P(T<=t) One-tail	0.0400874			P(T<=t) One-tail	0.458364			P(T<=t) One-tail	0.0391
t boundary value One-tail	2.01505			t boundary value One-tail	1.85955			t boundary value One-tail	1.94318
P(T<=t) Two-tail	0.0801749			P(T<=t) Two-tail	0.916728			P(T<=t) Two-tail	0.0782
t boundary value One-tail	2.57058			t boundary value One-tail	2.306			t boundary value One-tail	2.44691

## Sheet: Figure 3e
Patient: K7
	PTCH	ACTB	ΔΔCT				Relative expression	S.D.	PTCH average	ACTB average	ΔΔCT average
NF	31.9413	20.6146	0.000389335	0.962967		NF	1	0.142126	31.8515	20.6648	0.000429016
	31.9521	20.6798	0.000404307	1		KNF	0.795249	0.0461254	31.0297	19.5125	0.000341174
	31.661	20.6999	0.000501632	1.24072		KPF	0.583843	0.0188649	31.1536	19.1905	0.000250478
KNF	30.9769	19.4947	0.000349559	0.864588		KCF	0.655808	0.0484027	31.2541	19.4588	0.000281352
	31.1464	19.5324	0.000319029	0.789077		NS	0.60112	0.0355674	34.9194	22.9985	0.00025789
	30.9659	19.5105	0.000356105	0.880778		KNS	2.28515	0.0985549	31.8975	21.9031	0.000980366
KPF	31.1708	19.2232	0.000253178	0.626203		KPS	2.24714	0.0960411	31.796	21.7774	0.000964059
	31.1302	19.2044	0.00025703	0.63573		KCS	3.47123	0.318232	31.2425	21.8512	0.00148921
	31.1597	19.144	0.000241489	0.59729
KCF	31.1526	19.4481	0.00029964	0.741119
	31.3902	19.4757	0.000259044	0.64071
	31.2196	19.4526	0.000286931	0.709685		Fibroblasts (KNF, KPF, KCF)–Sphere (KNS, KPS, KCS)				NS–KNS
NS	34.9058	22.9557	0.000252737	0.625111		t-Test: Two-tailed test				t-Test: Two-tailed test
	35.001	23.0143	0.000246399	0.609435			#1	#2			#1	#2
	34.8515	23.0254	0.000275421	0.681217		Average	0.000291334	0.00115026		Average	0.000258185	0.00096465
KNS	31.8933	21.8549	0.000950925	2.35199		Variance	1.82509e-09	7.18353e-08		Variance	2.32837e-10	1.6977e-09
	31.9017	21.9513	0.00101072	2.49988		Number of observation	9	9		Number of observation	3	3
	31.8927	21.9591	0.00101623	2.5135		Difference from statistical hypothesis average	0			Difference from statistical hypothesis average	0
KPS	31.7832	21.6986	0.000920937	2.27782		Degree of freedom	8			Degree of freedom	3
	31.8272	21.8178	0.00097024	2.39976		t	-9.49429			t	-27.8492
	31.7777	21.8159	0.00100277	2.48022		P(T<=t) One-tail	6.24385e-06			P(T<=t) One-tail	5.0815e-05
KCS	31.1425	21.8136	0.00155498	3.84604		t boundary value One-tail	1.85955			t boundary value One-tail	2.35336
	31.4015	21.8548	0.00133707	3.30706		P(T<=t) Two-tail	1.24877e-05			P(T<=t) Two-tail	0.00010163
	31.1833	21.8852	0.00158851	3.92898		t boundary value One-tail	2.306			t boundary value One-tail	3.18245
						NS–KPS				NS–KCS
						t-Test: Two-tailed test				t-Test: Two-tailed test
							#1	#2			#1	#2
						Average	0.000258185	0.000992624		Average	0.000258185	0.00149352
						Variance	2.32837e-10	1.31173e-09		Variance	2.32837e-10	1.86395e-08
						Number of observation	3	3		Number of observation	3	3
						Difference from statistical hypothesis average	0			Difference from statistical hypothesis average	0
						Degree of freedom	3			Degree of freedom	2
						t	-32.3678			t	-15.5752
						P(T<=t) One-tail	3.24049e-05			P(T<=t) One-tail	0.00204847
						t boundary value One-tail	2.35336			t boundary value One-tail	2.91999
						P(T<=t) Two-tail	6.48097e-05			P(T<=t) Two-tail	0.00409694
						t boundary value One-tail	3.18245			t boundary value One-tail	4.30265

## Sheet: Figure 3f
K3	PTCH1	ACTB	ΔΔCT				K12	PTCH1	ACTB	ΔΔCT				K5	PTCH1	ACTB	ΔΔCT		PTCH1 expression
NS	36.3245	23.9549	0.000188958				NS	36.3245	23.9549	0.000188958				NS	35.7256	23.9671	0.000288627		NS from 3 patients	KNS from 3 patients	KPS from 3 patients	KCS from 3 patients
	35.9175	23.8477	0.000232624					35.9175	23.8477	0.000232624					35.8425	23.7779	0.000233443		0.000188958	0.00128761	0.000641033	0.00103123
	36.1748	23.6382	0.000168305					36.1748	23.6382	0.000168305					35.9725	23.6926	0.000201087		0.000232624	0.00135036	0.000686284	0.00119436
KNS	40.2313	30.6302	0.00128761				KNS	33.0618	22.7692	0.000797312				KNS	33.4061	23.5003	0.00104251		0.000168305	0.000848717	0.000639452	0.000734209
	40.2313	30.6988	0.00135036					32.7325	23.1208	0.00127819					33.5861	23.6747	0.00103847		0.000188958	0.000797312	0.000874231	0.00052693
	40.3675	30.165	0.000848717					32.7043	22.9683	0.00117269					33.3018	23.2468	0.000940048		0.000232624	0.00127819	0.000679123	0.000394663
KPS	32.9853	22.378	0.000641033				KPS	32.3337	22.174	0.000874231				KPS	33.4747	23.243	0.000831669		0.000168305	0.00117269	0.00106665	0.000411781
	32.964	22.4551	0.000686284					32.673	22.149	0.000679123					33.7601	23.163	0.000645584		0.000288627	0.00104251	0.000831669	0.00146101
	32.9344	22.3235	0.000639452					32.0737	22.201	0.00106665					33.4353	23.5293	0.00104229		0.000233443	0.00103847	0.000645584	0.00190253
KCS	32.3192	22.3978	0.00103123				KCS	33.196	22.3059	0.00052693				KCS	32.8345	23.4157	0.00146101		0.000201087	0.000940048	0.00104229	0.00171201
	32.0984	22.3889	0.00119436					33.3113	22.0042	0.000394663					32.7264	23.6885	0.00190253
	32.2068	21.7953	0.000734209					33.4457	22.1999	0.000411781					32.7741	23.584	0.00171201
	Relative expression	S.D.	Averege PTCH expression	Averege ACTB expression	average ΔΔCT			Relative expression	S.D.					K6	PTC1 Relative expression	S.D.
NS	1	0.16853	36.1389	23.8136	0.000194853		NS	1	0.16853	36.1389	23.8136	0.000194853		Normal Sphere	1	0.0757145
KNS	5.36498	1.40268	40.2994	30.3976	0.00104538		KNS	5.44623	1.29711	32.8328	22.9528	0.00106121		Keloid Normal Sphere	4.17756	1.18348
KPS	3.36597	0.13648	32.9598	22.3855	0.000655868		KPS	4.91195	0.994426	32.2037	22.1746	0.000957106		Keloid Peripheral Sphere	3.48409	0.92699
KCS	4.96285	1.19731	32.2082	22.194	0.000967024		KCS	2.26209	0.369172	33.3177	22.17	0.000440773		Keloid Center S Spehre	7.0186	2.09293
Relative PTCH expression
	KNS	KPS	KCS
K5	4.17756	3.48409	7.0186
K3	5.36498	3.36597	4.96285
K12	5.44623	4.91195	2.26209
Average	4.99626	3.92067	4.74785
S.D.	0.710172	0.860502	2.38554
t-Test: Two-tailed test				t-Test: Two-tailed test				t-Test: Two-tailed test
NS–KNS				NS–KPS				NS–KCS
	#1	#2			#1	#2			#1	#2
Average	0.000211437	0.00108399		Average	0.000211437	0.000789591		Average	0.000211437	0.00104097
Variance	1.52234e-09	4.00053e-08		Variance	1.52234e-09	2.97226e-08		Variance	1.52234e-09	3.20572e-07
Number of observation	9	9		Number of observation	9	9		Number of observation	9	9
Difference from statistical hypothesis average	0			Difference from statistical hypothesis average	0			Difference from statistical hypothesis average	0
Degree of freedom	9			Degree of freedom	9			Degree of freedom	8
t	-12.8453			t	-9.8124			t	-4.38494
P(T<=t) One-tail	2.15154e-07			P(T<=t) One-tail	2.09411e-06			P(T<=t) One-tail	0.00116665
t boundary value One-tail	1.83311			t boundary value One-tail	1.83311			t boundary value One-tail	1.85955
P(T<=t) Two-tail	4.30308e-07			P(T<=t) Two-tail	4.18823e-06			P(T<=t) Two-tail	0.0023333
t boundary value One-tail	2.26216			t boundary value One-tail	2.26216			t boundary value One-tail	2.306

## Sheet: Figure 3h
Patient: K7
	PTCH1	ACTB	ΔΔCT			GLI1	ACTB	ΔΔCT
NS	35.7256	23.9671	0.000288627		NS	35.9285	20.3613	2.05964e-05	1
	35.8425	23.7779	0.000233443			35.96	20.4447	2.13511e-05	1.03664
	35.9725	23.6926	0.000201087			36.1725	20.4439	1.84172e-05	0.894195
KNS	33.4061	23.5003	0.00104251		KNS	32.8204	21.088	0.00029388	14.2685
	33.5861	23.6747	0.00103847			32.8803	21.0303	0.000270879	13.1518
	33.3018	23.2468	0.000940048			32.7348	21.1183	0.000318497	15.4637
KPS	33.4747	23.243	0.000831669		KPS	32.8758	20.9258	0.000252745	12.2713
	33.7601	23.163	0.000645584			32.8061	20.8232	0.00024705	11.9948
	33.4353	23.5293	0.00104229			32.9351	20.7715	0.000217969	10.5829
KCS	32.8345	23.4157	0.00146101		KCS-s	32.4115	20.77	0.000313003	15.197
	32.7264	23.6885	0.00190253			32.2415	20.9379	0.000395607	19.2076
	32.7741	23.584	0.00171201			32.3923	20.9865	0.000368555	17.8941
KCS-f	34.6275	23.3563	0.000404623		KCS-f	34.8309	20.6754	5.47961e-05	2.66047
	34.6735	23.4026	0.000404679			35.3258	20.8191	4.29583e-05	2.08572
	34.8951	23.3256	0.000329025			34.7531	20.9859	7.17228e-05	3.4823
ΔΔCT average				PTCH1: NS–KNS				PTCH1: NS–KPS				PTCH1: NS–KCS
	Ptch1	GLI1		t-Test: Two-tailed test				t-Test: Two-tailed test				t-Test: Two-tailed test
NS	0.000241052	2.01215e-05			#1	#2			#1	#2			#1	#2
KNS	0.00100701	0.000294419		Average	0.000241052	0.00100701		Average	0.000241052	0.000839849		Average	0.000241052	0.00169185
KPS	0.000839849	0.000239255		Variance	1.95922e-09	3.36712e-09		Variance	1.95922e-09	3.93947e-08		Variance	1.95922e-09	4.90393e-08
KCS-s	0.00169185	0.000359055		Number of observation	3	3		Number of observation	3	3		Number of observation	3	3
KCS-f	0.000379442	5.64924e-05		Difference from statistical hypothesis average	0			Difference from statistical hypothesis average	0			Difference from statistical hypothesis average	0
Relative expression				Degree of freedom	4			Degree of freedom	2			Degree of freedom	2
	PTC1	GLI1		t	-18.1782			t	-5.10013			t	-11.1273
Normal Sphere	1	1		P(T<=t) One-tail	2.69279e-05			P(T<=t) One-tail	0.0181804			P(T<=t) One-tail	0.00398997
Keloid Normal Sphere	4.17756	14.632		t boundary value One-tail	2.13185			t boundary value One-tail	2.91999			t boundary value One-tail	2.91999
Keloid Peripheral Sphere	3.48409	11.8905		P(T<=t) Two-tail	5.38559e-05			P(T<=t) Two-tail	0.0363608			P(T<=t) Two-tail	0.00797993
Keloid Center S Spehre	7.0186	17.8443		t boundary value One-tail	2.77645			t boundary value One-tail	4.30265			t boundary value One-tail	4.30265
Keloid Center F Spehre	1.57411	2.80756
	S.D.	S.D.		GLI1: NS–KNS				GLI1: NS–KPS				GLI1: NS–KCS
Normal Sphere	0.183624	0.0757145		t-Test: Two-tailed test				t-Test: Two-tailed test				t-Test: Two-tailed test
Keloid Normal Sphere	0.240723	1.18348			#1	#2			#1	#2			#1	#2
Keloid Peripheral Sphere	0.823393	0.92699		Average	2.01216e-05	0.000294419		Average	2.01216e-05	0.000239255		Average	2.01216e-05	0.00169185
Keloid Center S Spehre	0.918672	2.09293		Variance	2.32104e-12	5.67086e-10		Variance	2.32104e-12	3.47918e-10		Variance	2.32104e-12	4.90393e-08
Keloid Center F Spehre	0.181134	0.718489		Number of observation	3	3		Number of observation	3	3		Number of observation	3	3
				Difference from statistical hypothesis average	0			Difference from statistical hypothesis average	0			Difference from statistical hypothesis average	0
				Degree of freedom	2			Degree of freedom	2			Degree of freedom	2
				t	-19.91			t	-20.2809			t	-13.0751
				P(T<=t) One-tail	0.00125658			P(T<=t) One-tail	0.0012112			P(T<=t) One-tail	0.00289929
				t boundary value One-tail	2.91999			t boundary value One-tail	2.91999			t boundary value One-tail	2.91999
				P(T<=t) Two-tail	0.00251316			P(T<=t) Two-tail	0.00242241			P(T<=t) Two-tail	0.00579857
				t boundary value One-tail	4.30265			t boundary value One-tail	4.30265			t boundary value One-tail	4.30265

## Sheet: Figure 3i
Patient: K7
	SMO	ACTB	ΔΔCT				SMO		Fibroblasts (NF, KNF, KPF, KCF)–Sphere (NS, KNS, KPS, KCS)
Normal F	30.0894	18.639	0.00035735			Relative expression			t-Test: Two-tailed test
	29.9263	18.8668	0.000468572			Normal F	1
	29.9987	18.7223	0.000403149			Keloid Normal F	0.702404			#1	#2
Keloid Normal F	30.5623	18.7436	0.000276827			Keloid Peripheral F	1.46853		Average	0.000414573	0.00709925
	30.1292	18.6097	0.000340626			Keloid Center F	0.876734		Variance	1.60299e-08	2.39759e-05
	30.5598	18.5699	0.000245851			Normal S	35.4625		Number of observation	12	12
Keloid Peripheral F	29.9453	19.1582	0.000565899			Keloid Normal S	13.7325		Difference from statistical hypothesis average	0
	30.0353	19.3503	0.000607467			Keloid Peripheral S	14.5977		Degree of freedom	11
	29.6579	19.0291	0.000631566			Keloid Center S	5.52059		t	-4.72758
Keloid Center F	29.9288	18.426	0.000344593			S.D.			P(T<=t) One-tail	0.000310891
	30.048	18.5785	0.000352645			Normal F	0.136442		t boundary value One-tail	1.79588
	29.9719	18.6114	0.000380332			Keloid Normal F	0.117957		P(T<=t) Two-tail	0.000621781
Normal S	26.9957	20.8937	0.0145587			Keloid Peripheral F	0.0810816		t boundary value One-tail	2.20099
	27.1836	20.8026	0.0119987			Keloid Center F	0.0457584
	26.8417	20.9658	0.0170285			Normal S	6.13892
Keloid Normal S	28.628	21.1939	0.00578245			Keloid Normal S	2.07126
	28.649	21.358	0.00638561			Keloid Peripheral S	2.94628
	28.9521	21.2221	0.00471021			Keloid Center S	1.4151
Keloid Peripheral S	28.701	21.1797	0.00544339
	28.5633	21.4778	0.00736296
	28.6621	21.0568	0.00513532
Keloid Center S	28.7734	19.6171	0.00175264
	28.1818	19.7485	0.00289275
	28.8039	19.9356	0.00213981

## Sheet: Figure 4d
KNS	Average		K11	K14	K9		SEM
GLI1	0.181453		0.402998	0.0984911	0.0428706		0.11193
SPP1	0.332367		0.620881	0.327863	0.048356		0.165289
NES	0.522198		0.362197	0.93318	0.271217		0.207163
FGF1	0.194065		0.231029	0.23169	0.119476		0.0372951
BCL2	0.576368		0.675891	0.533123	0.520091		0.0499031
IGFBP7	0.509863		0.379337	0.530771	0.619483		0.0701079
PLXDC1	0.382899		0.270117	0.308284	0.570297		0.0943446
KMS	Average		K11	K14	K9		SEM
GLI1	0.163261		0.193834	0.261748	0.0342021		0.0674421
SPP1	1.09464		1.45683	1.76311	0.0639758		0.522861
NES	0.457284		0.260439	0.775618	0.335795		0.160647
FGF1	0.546613		0.995358	0.562005	0.0824741		0.263639
BCL2	0.842417		0.315765	1.73597	0.475514		0.449151
IGFBP7	0.683896		1.1777	0.608013	0.265977		0.265911
PLXDC1	0.521629		0.139162	0.696728	0.728996		0.19146
KCS	Average		K11	K14	K9		SD
GLI1	0.1917		0.105016	0.326875	0.143208		0.068481
SPP1	0.330668		0.0537745	0.693062	0.245167		0.189433
NES	0.335307		0.0443618	0.586176	0.375382		0.157687
FGF1	0.0736167		0	0.168189	0.0526608		0.0496698
BCL2	1.78897		1.37283	2.20222	1.79187		0.239429
IGFBP7	0.777789		1.3311	0.866675	0.135593		0.347962
PLXDC1	0.35161		0.118666	0.673529	0.262636		0.166238
See also Supplementary Fig 5 d,e,f in Source data file 2

[truncated: 12 more sheets: Figure 4e, Figure 4i, Figure 5b, Figure 5d, Figure 5f, Figure 5g, Figure 6b, Figure 6c, Figure 7b, Figure 7d, Figure 7f, Figure 7h]
