# Supplementary material for: Keloid pathogenesis and fibroproliferative properties are dependent on stem cells regulated by the HEDGEHOG-GLI1 pathway
Source: Research Square preprint supplement (doi:10.21203/rs.3.rs-2515946/v1), 2023-05-23
Supplement: Supplementary file 2 [file 826a65165614e5e73e2b0d22.xlsx]

## Sheet: Supplementary Fig 2b
Patient K2
Normal N4
	positive cells	Total cells	%
Normal	1	1114	0.0897666
Keloid Normal	5	1061	0.471254
Keloid Peripheral	5	1026	0.487329
Keloid	3	1222	0.245499

## Sheet: Supplementary Fig 2c
Patient K2
Normal N4
	positive cells	Total cells	%
Mature Scar Mock	3	1327	0.226074
Mature Scar SAG	5	1403	0.356379
KN Mock	7	1302	0.537634
KN SAG	19	1364	1.39296

## Sheet: Supplementary Fig 3a
Relative expression
SOX2	Keloid Normal	Keloid Peripheral	Keloid Center			POU5F1	Keloid Normal	Keloid Peripheral	Keloid Center			NANOG	Keloid Normal	Keloid Peripheral	Keloid Center
K6	0.501657	0.976371	0.13526			K6	2.21017	1.19912	0.422671			K6	2.69037	2.43513	0.673479
K4	1.17024	0.99063	1.97463			K4	1.50639	2.17533	1.56319			K4	1.3666	1.5577	1.95203
K5	0.339521	2.33815	0.465365			K5	4.70995	2.98718	4.16379			K5	2.39249	1.31068	1.51722
K3	0.246767	0.208569	0.621679			K3	3.41465	2.39402	0.983515			K3	3.6152	2.08436	0.860415
K2	0.152332	0.271688	0.127861			K2	2.74485	1.99041	1.29869			K2	3.13943	3.60688	0.689834
K1	0.239039	0.184901	0.37039
Average	0.482104	0.957081	0.66496			Average	2.9172	2.14921	1.68637			Average	2.64082	2.19895	1.1386
S.D.	0.405703	0.857157	0.762564			S.D.	0.546873	0.290748	0.647844			S.D.	0.379854	0.4032	0.254965

## Sheet: Supplementary Fig 3b
K2											Normal Dermis	Keloid Normal	Keloid Peripheral	Keloid Center			Normal Dermis	Keloid Normal	Keloid Peripheral	Keloid Center
KN				KP			KC			N1	0.18315	-	-	-		Average	0.0610501	0.279514	0.486903	0.247748
	OCT4 positive cells	Cells		GLI1-OCT4 double positive	Cells		GLI1-OCT4 double positive	Cells		N2	0	-	-	-		S.D.	0.105742	0.120176	0.256456	0.204153
1	0	190		1	225		0	182		N3	0	-	-	-
2	0	149		2	170		1	351		K2	-	0.228833	0.365297	0.175747
3	1	98		0	185		1	190		K3	-	0.200267	0.397919	0.292398
4	-	-		1	207		0	415		K4	-	0.429799	0.941176	0.581058
5	-	-		0	308		-	-		K5	-	0.155039	0.318598	0.123355
SUM	1	437		4	1095		2	1138		K6	-	0.383632	0.411523	0.0661813
%	0.228833			0.365297			0.175747				Normal Dermis	Keloid Normal	Keloid Peripheral	Keloid Center
											0.0610501	0.279514	0.486903	0.247748
K3
KN				KP			KC
	OCT4 positive cells	Cells		OCT4 positive cells	Cells		OCT4 positive cells	Cells		NvsKN				NvsKP				NvsKC
1	3	314		4	552		1	681			#1	#2			#1	#2			#1	#2
2	0	414		1	577		1	757		Average	0.0610501	0.279514		Average	0.0610501	0.486903		Average	0.0610501	0.247748
3	0	655		4	774		2	728		Variance	0.0111813	0.0144422		Variance	0.0111813	0.0657698		Variance	0.0111813	0.0416782
4	0	115		2	684		0	53		Number of observation	3	5		Number of observation	3	5		Number of observation	3	5
5	-	-		2	680		3	175		Difference from statistical hypothesis average	0			Difference from statistical hypothesis average	0			Difference from statistical hypothesis average	0
SUM	3	1498		13	3267		7	2394		Degree of freedom	5			Degree of freedom	6			Degree of freedom	6
%	0.200267			0.397919			0.292398			t	-2.68594			t	-3.27762			t	-1.69987
										P(T<=t) One-tail	0.0217547			P(T<=t) One-tail	0.00843631			P(T<=t) One-tail	0.0700324
K4										t boundary value One-tail	2.01505			t boundary value One-tail	1.94318			t boundary value One-tail	1.94318
KN				KP			KC			P(T<=t) Two-tail	0.0435095			P(T<=t) Two-tail	0.0168726			P(T<=t) Two-tail	0.140065
	OCT4 positive cells	Cells		OCT4 positive cells	Cells		OCT4 positive cells	Cells		t boundary value One-tail	2.57058			t boundary value One-tail	2.44691			t boundary value One-tail	2.44691
1	3	362		4	426		4	244
2	0	143		6	422		1	431
3	0	127		3	333		2	387
4	0	66		5	465		3	326
5	-	-		2	479		0	333
SUM	3	698		20	2125		10	1721
%	0.429799			0.941176			0.581058
K5
KN				KP			KC
	OCT4 positive cells	Cells		OCT4 positive cells	Cells		OCT4 positive cells	Cells
1	0	117		0	420		0	651
2	0	172		2	542		1	515
3	1	193		1	508		1	465
4	0	86		1	454		0	436
5	0	77		4	587		1	365
SUM	1	645		8	2511		3	2432
%	0.155039			0.318598			0.123355
K6
KN				KP			KC
	OCT4 positive cells	Cells		OCT4 positive cells	Cells		OCT4 positive cells	Cells
1	0	158		1	309		1	252
2	0	193		1	270		0	299
3	1	152		2	368		0	307
4	1	175		2	531		0	261
5	1	104		2	466		0	392
SUM	3	782		8	1944		1	1511
%	0.383632			0.411523			0.0661813
N1
	OCT4 positive cells	Cells
1	0	117
2	0	81
3	1	124
4	0	144
5	0	80
SUM	1	546
%	0.18315
N2
	GLI1-OCT4 double positive	Cells
1	0	78
2	0	134
3	0	51
4	0	126
5	0	62
SUM	0	451
%	0
N3
	GLI1-OCT4 double positive	Cells
1	0	55
2	0	64
3	0	88
4	0	69
5	-	-
SUM	0	276
%	0

## Sheet: Supplementary Fig 3c
K2												Normal Dermis	Keloid Normal	Keloid Peripheral	Keloid Center
KN				KP			KC				N1	0	-	-	-
	NANOG positive cells	Cells		NANOG positive cells	Cells		NANOG positive cells	Cells			N2	0	-	-	-
1	0	111		1	382		1	275			N3	0	-	-	-
2	0	147		0	365		1	141			K2	-	0.15528	0.133869	0.390244
3	0	75		-	-		2	280			K3	-	0.0531915	0.235018	0.235929
4	0	135		-	-		0	179			K4	-	0.224215	0.242718	0.436681
5	1	176		-	-		0	150			K5	-	0.198807	0.301334	0.106781
SUM	1	644		1	747		4	1025			K6	-	0.155039	0.411523	0.106781
%	0.15528			0.133869			0.390244					Normal Dermis	Keloid Normal	Keloid Peripheral	Keloid Center
											Average %	0	0.157306	0.264892	0.255283
K3
KN				KP			KC				t-Test: Two-tailed test				t-Test: Two-tailed test				t-Test: Two-tailed test
	NANOG positive cells	Cells		NANOG positive cells	Cells		NANOG positive cells	Cells			Normal Dermis–Keloid Normal				Normal Dermis–Keloid Peripheral				Normal Dermis–Keloid Center
1	1	289		2	334		1	666				#1	#2			#1	#2			#1	#2
2	0	600		1	657		2	706			Average	0	0.157306		Average	0	0.264892		Average	0	0.255283
3	0	416		1	615		2	660			Variance	0	0.00426207		Variance	0	0.010345		Variance	0	0.0239001
4	0	575		1	622		1	271			Number of observation	3	5		Number of observation	3	5		Number of observation	3	5
5	-	-		1	325		1	664			Difference from statistical hypothesis average	0			Difference from statistical hypothesis average	0			Difference from statistical hypothesis average	0
SUM	1	1880		6	2553		7	2967			Degree of freedom	4			Degree of freedom	4			Degree of freedom	4
%	0.0531915			0.235018			0.235929				t	-5.38792			t	-5.82358			t	-3.69239
											P(T<=t) One-tail	0.00286911			P(T<=t) One-tail	0.00216507			P(T<=t) One-tail	0.0104874
K4											t boundary value One-tail	2.13185			t boundary value One-tail	2.13185			t boundary value One-tail	2.13185
KN				KP			KC				P(T<=t) Two-tail	0.00573821			P(T<=t) Two-tail	0.00433013			P(T<=t) Two-tail	0.0209748
	NANOG positive cells	Cells		NANOG positive cells	Cells		NANOG positive cells	Cells			t boundary value One-tail	2.77645			t boundary value One-tail	2.77645			t boundary value One-tail	2.77645
1	1	165		1	269		1	320
2	0	109		1	275		0	273			t-Test: Two-tailed test				t-Test: Two-tailed test
3	0	142		1	251		1	372			Keloid Normal–Keloid Peripheral				Keloid Normal–Keloid Center
4	0	30		0	463		5	300				#1	#2			#1	#2
5	-	-		1	390		0	338			Average	0.157306	0.264892		Average	0.157306	0.255283
SUM	1	446		4	1648		7	1603			Variance	0.00426207	0.010345		Variance	0.00426207	0.0239001
%	0.224215			0.242718			0.436681				Number of observation	5	5		Number of observation	5	5
											Difference from statistical hypothesis average	0			Difference from statistical hypothesis average	0
K5											Degree of freedom	7			Degree of freedom	5
KN				KP			KC				t	-1.99049			t	-1.30549
	NANOG positive cells	Cells		NANOG positive cells	Cells		NANOG positive cells	Cells			P(T<=t) One-tail	0.0434143			P(T<=t) One-tail	0.124283
1	1	92		2	305		1	161			t boundary value One-tail	1.89458			t boundary value One-tail	2.01505
2	0	85		2	439		0	431			P(T<=t) Two-tail	0.0868286			P(T<=t) Two-tail	0.248566
3	0	76		2	446		1	587			t boundary value One-tail	2.36462			t boundary value One-tail	2.57058
4	0	104		0	507		0	343
5	0	146		1	626		0	351
SUM	1	503		7	2323		2	1873
%	0.198807			0.301334			0.106781
K6
KN				KP			KC
	NANOG positive cells	Cells		NANOG positive cells	Cells		NANOG positive cells	Cells
1	0	117		1	309		1	161
2	0	172		1	270		0	431
3	1	193		2	368		1	587
4	0	86		2	531		0	343
5	0	77		2	466		0	351
SUM	1	645		8	1944		2	1873
%	0.155039			0.411523			0.106781
N1
	NANOG positive cells	Cells
1	0	60
2	0	180
3	0	78
4	0	57
5	0	75
SUM	0	450
%	0
N2
	NANOG positive cells	Cells
1	0	101
2	0	68
3	0	83
4	0	152
5	0	110
SUM	0	514
%	0
N3
	NANOG positive cells	Cells
1	0	74
2	0	53
3	0	67
4	0	95
5	-	-
SUM	0	289
%	0

## Sheet: Supplementary Fig 5b
ΔΔCT
SPP1	Normal	Keloid Normal	Keloid Peripheral	Keloid Center		BCL2	Normal	Keloid Normal	Keloid Peripheral	Keloid Center		NES	Normal	Keloid Normal	Keloid Peripheral	Keloid Center		IGFBP7	Normal	Keloid Normal	Keloid Peripheral	Keloid Center		FGF1	Normal	Keloid Normal	Keloid Peripheral	Keloid Center		COL1A1	Normal	Keloid Normal	Keloid Peripheral	Keloid Center		IDS	Normal	Keloid Normal	Keloid Peripheral	Keloid Center		NR2F2	Normal	Keloid Normal	Keloid Peripheral	Keloid Center		BCL-XL	Normal
K1	0.0207596	0.0670157	0.145821	1.20652		K1	0.00722317	0.048493	0.027017	0.00694545		K1	0.115945	0.282636	0.428688	0.223755		K5	0.0148187	0.0808138	0.0473605	0.0285221		K5	0.000453092	0.0030342	0.00245329	0.00287627		K5	7.14485	17.4359	8.15184	9.03756		K5	0.033299	0.0668684	0.0626514	0.0481234		K5	0.0122382	0.0467521	0.0574063	0.0537488		K5	0.0165836
K10	0.0104872	0.178758	0.168209	0.20531		K10	0.00509639	0.0105607	0.00960801	0.00895663		K10	0.106243	0.153731	0.141023	0.230796		K7	0.0829719	0.0955004	0.120738	0.101237		K7	0.000293181	0.000278518	0.000656853	0.00140985		K7	16.9452	40.4293	51.1112	27.0439		K7	0.0219381	0.0233457	0.0298606	0.0245605		K7	0.00883517	0.0179494	0.011556	0.0126759		K7	0.0816275
K7	0.0111685	0.311481	0.417115	0.625715		K7	0.0114447	0.0101145	0.00984905	0.00910654		K7	0.17947	0.474278	0.414361	0.605352		K12	0.033299	0.0668684	0.0626514	0.0481234		K12	0.00027209	0.00376533	0.00160625	0.00295313		K12	18.3555	25.1057	32.9826	29.4929		K12	0.0542415	0.0649626	0.0768927	0.117078		K12	0.020385	0.0514026	0.048437	0.0631459		K12	0.0646081
K12	0.0144607	0.12947	0.440001	0.119818		K12	0.0117646	0.0402522	0.0199791	0.00684985		K12	0.0117646	0.0402522	0.0199791	0.00684985		K3	0.033299	0.0668684	0.0626514	0.0481234		K3	0.000228676	0.000148563	0.000264305	0.000196585		K3	6.10943	13.528	17.2767	19.7195		K3	0.0648123	0.0871093	0.0739123	0.0731398		K3	0.0179609	0.101005	0.0876877	0.0664631		K3	0.0260605
																														K13	12.7488	8.29078	9.34846	8.83667		K13	0.0468272	0.0543015	0.0514392	0.0376538		K13	0.0159488	0.0303244	0.0577826	0.0437394
	Relative expression						Relative expression						Relative expression					Relative expression						Relative expression						Relative expression
	SPP1	Keloid Normal	Keloid Peripheral	Keloid Center			BCL2	Keloid Normal	Keloid Peripheral	Keloid Center			NES	Keloid Normal	Keloid Peripheral	Keloid Center		IGFBP7	Keloid Normal	Keloid Peripheral	Keloid Center			FGF1	Keloid Normal	Keloid Peripheral	Keloid Center			COL1A1	Keloid Normal Sphere	Keloid Peripherak Sphere	Keloid Center Sphere
	K1	3.22817	7.02427	58.1184			K1	6.71353	3.74032	0.961551			K1	2.43768	3.69734	1.92984		K5	5.45351	3.196	1.92474			K5	6.69666	5.41456	6.3481			K5	2.44034	1.14094	1.26491			Relative expression						Relative expression						Relative expression
	K10	17.0453	16.0394	19.5771			K10	2.07219	1.88526	1.75744			K10	1.44698	1.32737	2.17235		K7	0.45507	3.30938	8.01299			K7	0.949986	2.24044	4.8088			K7	2.38588	3.01626	1.59596			IDS	Keloid Normal	Keloid Peripheral	Keloid Center			NR2F2	Keloid Normal Sphere	Keloid Peripherak Sphere	Keloid Center Sphere			BCL-XL	Keloid Normal Sphere
	K7	27.8893	37.3475	56.0249			K7	0.883772	0.860581	0.795703			K7	2.64265	2.3088	3.37299		K12	10.8781	6.76319	10.3285			K12	13.8386	5.90339	10.8535			K12	1.36775	1.79688	1.60676			K5	2.00812	1.88148	1.44519			K5	3.82016	4.69073	4.39187			K5	3.33441
	K12	8.95321	30.4273	8.28572			K12	3.42145	1.69823	0.58224			K12	3.42145	1.69823	0.58224		K3	1.60374	3.08181	5.56328			K3	1.83001	4.38497	9.86523			K3	2.21428	2.82788	3.22772			K7	1.06417	1.36113	1.11954			K7	2.03159	1.30796	1.4347			K7	1.10344
	K3	72.9344	18.2934	16.0312			K3	18.1879	8.03256	2.79695			K3	12.1882	6.14523	3.11659			4.59761	4.0876	6.45738									K13	0.650317	0.73328	0.693137			K12	1.19766	1.4176	2.15846			K12	2.52158	2.37611	3.09766			K12	0.9531
																																				K3	1.34402	1.14041	1.12849			K3	5.62359	4.88214	3.70043			K3	1.4529
																																				K13	1.15961	1.09849	0.8041			K13	1.90135	3.62299	2.74248			Avarage	1.71096
																																				Avarage	1.35472	1.37982	1.30265			Avarage	3.17966	3.37599	3.07343
[truncated: 33 more columns]

## Sheet: Supplementary Fig 6d
K14 KNS
GLI1							NES							FGF1							BCL2							IGFBP7							PLXDC1							SPP1						GLI1	0.0984911
siControl	31.2355	24.4601	0.00912849				siControl	30.2006	24.4601	0.018704				siControl	34.6373	24.4296	0.000845622				siControl	32.3869	24.4296	0.00402358				siControl	28.7803	24.4296	0.0490121				siControl	28.7264	24.2573	0.0451501				siControl	25.4853	24.4601	0.491339			SPP1	0.327863
	31.0986	24.5581	0.0107428					30.2164	24.5581	0.0198011					34.3876	24.5457	0.00108962					32.7549	24.5457	0.00337888					28.7661	24.5457	0.0536448					28.831	24.2311	0.0412361					25.4519	24.5581	0.538188			NES	0.93318
	31.2164	24.5913	0.0101311					30.3363	24.5913	0.0186458					34.4692	24.6025	0.00107113					32.669	24.6025	0.00373036					28.7197	24.6025	0.0576219					28.7098	24.2745	0.0462201					25.3925	24.5913	0.57389			FGF1	0.23169
siGLI1-1	35.4177	25.9126	0.00137623				siGLI1-1	31.8563	25.9126	0.0162476				siGLI1-1	37.6372	25.8506	0.00028307				siGLI1-1	34.2693	25.8506	0.00292221				siGLI1-1	30.32	25.8506	0.0451428				siGLI1-1	32.1931	25.9226	0.0129544				siGLI1-1	28.7538	25.9126	0.139545			BCL2	0.533123
194	37.4007	25.8799	0.000340335				194	31.929	25.8799	0.0151024				194	38.17	25.8927	0.000201442				194	34.2455	25.8927	0.00305867				194	30.4023	25.8927	0.0438999				194	32.2987	25.9128	0.0119581				194	28.668	25.8799	0.144775			IGFBP7	0.530771
	37.0973	25.9562	0.00044277					31.6085	25.9562	0.019882					Undetermined	25.9557	0					34.3661	25.9557	0.00293912					30.2843	25.9557	0.0497706					31.9066	25.8316	0.0148328					28.6364	25.9562	0.156018			PLXDC1	0.308284
siGLI1-3	33.9299	24.3442	0.00130139				siGLI1-3	30.4563	24.3442	0.0144572				siGLI1-3	34.96	24.2803	0.000609642				siGLI1-3	34.579	24.2803	0.000793901				siGLI1-3	30.9329	24.2803	0.00993929				siGLI1-3	30.0513	23.9488	0.0145532				siGLI1-3	26.8616	24.3442	0.174662
2939	33.2984	24.5203	0.00227782				2939	30.1243	24.5203	0.0205591				2939	36.3638	24.4305	0.000255695				2939	33.9387	24.4305	0.00137324				2939	31.0287	24.4305	0.0103212				2939	30.2261	23.8952	0.0124228				2939	26.7737	24.5203	0.209727
	34.3405	24.4541	0.00105657					30.1512	24.4541	0.0192763					35.9231	24.4242	0.000345519					34.6971	24.4242	0.000808252					30.9406	24.4242	0.0109239					30.13	23.9611	0.0138991					26.7137	24.4541	0.20884
siControl	1	0.0414608	31.1575	24.5747	0.0104325		siControl	1	0.00220437	30.2685	24.5257	0.0186749		siControl	1	0.179739	34.5124	24.4876	0.000959899		siControl	1	0.123637	32.5709	24.4876	0.00368716		siControl	1	0.0808304	28.7554	24.5259	0.0533097		siControl	1	0.0636937	28.7787	24.2543	0.0434519		siControl	1	0.063209	25.4686	24.5365	0.524091
siGLI1-1	0.0567375	0.0547143	36.6386	25.9162	0.000591914		siGLI1-1	0.908184	0.0433623	31.7979	25.9162	0.0169602		siGLI1-1	0.0699526	0.121161	38.17	25.9242	6.71474e-05		siGLI1-1	0.806234	0.0201744	34.2937	25.8997	0.00297272		siGLI1-1	0.8667	0.340424	30.3355	25.8997	0.0462035		siGLI1-1	0.303686	0.877579	32.1328	25.889	0.0131958		siGLI1-1	0.279761	0.100206	28.6861	25.9162	0.14662
siGLI1-3	0.140245	0.0619329	33.8563	24.4395	0.0014631		siGLI1-3	0.958176	0.172274	30.2439	24.4395	0.0178938		siGLI1-3	0.393427	0.191673	35.749	24.3783	0.00037765		siGLI1-3	0.260013	0.0896134	34.4049	24.3783	0.000958709		siGLI1-3	0.194841	0.00931201	30.9674	24.3783	0.0103869		siGLI1-3	0.312881	0.0251162	30.1358	23.935	0.0135953		siGLI1-3	0.375966	0.0381496	26.783	24.4395	0.19704
	GLI1	SPP1	NES	FGF1	BCL2	IGFBP7	PLXDC1	NR2F2
siControl	1	1	1	1	1	1	1	1
siGLI1-1	0.0567375	0.279761	0.908184	0.0699526	0.806234	0.8667	0.303686	0.939092
siGLI1-3	0.140245	0.375966	0.958176	0.393427	0.260013	0.194841	0.312881	0.570288
siControl	0.0414608	0.063209	0.00220437	0.179739	0.123637	0.0808304	0.0636937	0.0875785
siGLI1-1	0.0547143	0.100206	0.0433623	0.121161	0.0201744	0.340424	0.877579	0.925808
siGLI1-3	0.0619329	0.0381496	0.172274	0.191673	0.0896134	0.00931201	0.0251162	0.368652
K14 KMS																																																GLI1	0.261748
GLI1							NES							FGF1							BCL2							IGFBP7							PLXDC1							SPP1						SPP1	1.76311
siControl	40.9284	24.5327	1.15988e-05				siControl	28.914	24.5327	0.0479852				siControl	34.5779	24.6062	0.000995927				siControl	33.9282	24.6062	0.00156237				siControl	28.0645	24.6062	0.090983				siControl	28.7298	24.163	0.042193				siControl	27.8886	24.5327	0.0976779			NES	0.775618
	30.4731	24.5747	0.0167643					28.6252	24.5747	0.060347					34.3009	24.6444	0.00123912					33.8253	24.6444	0.00172299					28.039	24.6444	0.0950906					28.7397	24.2097	0.0432834					27.7858	24.5747	0.107985			FGF1	0.562005
	29.6718	24.595	0.0296303					28.6869	24.595	0.0586425					33.9146	24.6562	0.00163283					34.0038	24.6562	0.00153491					28.1272	24.6562	0.0901798					28.7409	24.2301	0.0438642					27.9053	24.595	0.100814			BCL2	1.73597
siGLI1-1	33.8739	25.553	0.00312719				siGLI1-1	30.8438	25.553	0.0255451				siGLI1-1	38.2477	25.6012	0.000155963				siGLI1-1	34.6229	25.6012	0.00192391				siGLI1-1	29.0304	25.6012	0.0928351				siGLI1-1	31.521	25.2499	0.0129481				siGLI1-1	27.8591	25.553	0.202206			IGFBP7	0.608013
194	34.8619	25.5758	0.00160188				194	31.1052	25.5758	0.0216513				194	36.9845	25.5936	0.000372382				194	33.6649	25.5936	0.00371774				194	29.0705	25.5936	0.0898143				194	31.7301	25.2498	0.0112003				194	27.9108	25.5758	0.198206			PLXDC1	0.696728
	32.4558	25.6674	0.00904685					31.3399	25.6674	0.0196064					36.6848	25.7261	0.000502467					34.0214	25.7261	0.00318319					28.9901	25.7261	0.104096					31.6241	25.2699	0.0122237					28.1039	25.6674	0.184731
siGLI1-3	30.5064	22.9625	0.00535864				siGLI1-3	27.3862	22.9625	0.0465943				siGLI1-3	33.5265	23.0302	0.000692322				siGLI1-3	31.647	23.0302	0.00254738				siGLI1-3	29.0418	23.0302	0.0155003				siGLI1-3	27.3019	22.855	0.045851				siGLI1-3	25.7875	22.9625	0.141123
2939	29.157	23.1108	0.0151331				2939	27.0843	23.1108	0.0636582				2939	33.0341	23.1572	0.00106356				2939	31.4883	23.1572	0.00310519				2939	28.936	23.1572	0.018214				2939	27.2273	22.8355	0.0476358				2939	25.6675	23.1108	0.169966
	30.4228	23.1704	0.00655865					26.9388	23.1704	0.0733851					33.5634	23.1596	0.000738154					31.5577	23.1596	0.00296427					29.1182	23.1596	0.0160796					27.2071	22.9081	0.0507986					25.3819	23.1704	0.215919
siControl	1	0.408194	30.0725	24.5848	0.0222875		siControl	1	0.142061	28.8005	24.5639	0.0530469		siControl	1	0.1548	34.4394	24.6253	0.00111089		siControl	1	0.0692194	33.8768	24.6253	0.00164072		siControl	1	0.000106925	28.0769	24.6356	0.0920596		siControl	1	0.0178614	28.7348	24.2009	0.0431693		siControl	1	0.0486001	27.8455	24.5848	0.104338
siGLI1-1	0.159968	0.176453	33.7305	25.5987	0.00356528		siGLI1-1	0.417256	0.0519036	31.0963	25.5987	0.0221342		siGLI1-1	0.389383	0.0828019	36.8347	25.6599	0.000432561		siGLI1-1	1.72746	0.542719	34.1031	25.6403	0.00283428		siGLI1-1	1.03616	9.93356e-05	29.0303	25.6403	0.0953888		siGLI1-1	0.280353	0.0203427	31.6251	25.2565	0.0121026		siGLI1-1	1.868	0.481333	27.9579	25.5987	0.194902
siGLI1-3	0.363528	0.239182	30.0287	23.0812	0.00810213		siGLI1-3	1.13398	0.255657	27.1364	23.0812	0.0601541		siGLI1-3	0.734628	0.1822	33.3746	23.1157	0.000816091		siGLI1-3	1.74448	0.176787	31.5643	23.1157	0.0028622		siGLI1-3	0.179862	5.85656e-05	29.032	23.1157	0.016558		siGLI1-3	1.1131	0.0580404	27.2454	22.8662	0.048052		siGLI1-3	1.65822	0.361544	25.6123	23.0812	0.173015
	GLI1	SPP1	NES	FGF1	BCL2	IGFBP7	PLXDC1	NR2F2
siControl	1	1	1	1	1	1	1	1
siGLI1-1	0.159968	1.868	0.417256	0.389383	1.72746	1.03616	0.280353	1.09341
siGLI1-3	0.363528	1.65822	1.13398	0.734628	1.74448	0.179862	1.1131	2.38426
siControl	0.408194	0.0486001	0.142061	0.1548	0.0692194	0.000106925	0.0178614	6.11514e-05
siGLI1-1	0.176453	0.481333	0.0519036	0.0828019	0.542719	9.93356e-05	0.0203427	0.000475348
siGLI1-3	0.239182	0.361544	0.255657	0.1822	0.176787	5.85656e-05	0.0580404	5.99967e-05
K14 KCS
GLI1							NES							FGF1							BCL2							IGFBP7							PLXDC1							SPP1						GLI1	0.326875
siControl	32.773	23.661	0.00180716				siControl	28.3253	23.661	0.0394373				siControl	33.8098	23.7728	0.000951836				siControl	32.4199	23.7728	0.00249424				siControl	27.8921	23.7728	0.0575369				siControl	27.6181	24.3571	0.104315				siControl	26.9127	23.661	0.104984			SPP1	0.693062
	32.1451	23.719	0.00290731					28.363	23.719	0.039997					33.0405	23.8583	0.00172138					32.0593	23.8583	0.00339812					27.9336	23.8583	0.05932					27.5998	24.2963	0.101287					26.921	23.719	0.108667			NES	0.586176
	32.2972	23.7815	0.00273238					28.3071	23.7815	0.0434195					33.9117	23.8862	0.00095948					31.9537	23.8862	0.00372778					27.9281	23.8862	0.0607111					27.5422	24.5801	0.128323					26.9344	23.7815	0.112431			FGF1	0.168189
siGLI1-2	Undetermined	30.0588	0				siGLI1-2	37.3153	30.0588	0.00653966				siGLI1-2	0	30.194	0				siGLI1-2	37.0612	30.194	0.00856564				siGLI1-2	33.6343	30.194	0.0921245				siGLI1-2	33.8542	30.5745	0.10297				siGLI1-2	33.8163	30.0588	0.0739409			BCL2	2.20222
1091	Undetermined	30.2567	0				1091	36.528	30.2567	0.0129462				1091	45.2846	30.2389	2.95668e-05				1091	37.5467	30.2389	0.00631138				1091	33.3962	30.2389	0.112086				1091	33.6978	30.972	0.151161				1091	33.8169	30.2567	0.084776			IGFBP7	0.866675
	38.7502	30.1971	0.00266238					36.5996	30.1971	0.0118211					0	30.3546	0					35.7629	30.3546	0.0235485					33.8767	30.3546	0.0870498					33.9085	30.8374	0.118988					34.279	30.1971	0.0590501			PLXDC1	0.673529
siGLI1-3	32.8408	22.652	0.000856774				siGLI1-3	27.4146	22.652	0.0368402				siGLI1-3	33.9626	22.7243	0.000413933				siGLI1-3	31.964	22.7243	0.00165411				siGLI1-3	30.3079	22.7243	0.00521331				siGLI1-3	29.2875	23.3069	0.0158366				siGLI1-3	26.3448	22.652	0.077333			NR2F2	1.27956
2939	32.8686	22.7912	0.000925526				2939	27.427	22.7912	0.040225				2939	33.9154	22.8884	0.000479225				2939	32.1901	22.8884	0.00158453				2939	30.0681	22.8884	0.00689726				2939	28.1522	23.3435	0.0356793				2939	26.3713	22.7912	0.0836145
	32.6203	22.7905	0.00109883					27.488	22.7905	0.0385388					34.3105	22.9312	0.00037541					31.9074	22.9312	0.00198561					30.2654	22.9312	0.00619734					28.8373	23.4853	0.0244839					26.3735	22.7905	0.0834482
siControl	1	0.0438878	32.2211	23.7503	0.00281849		siControl	1	0.0680476	28.3162	23.7213	0.0413805		siControl	1	0.425109	33.4251	23.8155	0.00128003		siControl	1	0.202171	32.1443	23.8391	0.00316137		siControl	1	0.0268891	27.918	23.8391	0.059175		siControl	1	0.0196458	27.609	24.4112	0.108987		siControl	1	0.0240828	26.9277	23.7503	0.110533
siGLI1-2	0.31487	0.545371	38.7502	30.1709	0.000887459		siGLI1-2	0.241725	0.082662	36.8143	30.1709	0.0100027		siGLI1-2	0.00769952	0.013336	22.6423	30.2164	9.85562e-06		siGLI1-2	3.85627	3.85543	36.6548	30.2968	0.0121911		siGLI1-2	1.6309	0.223663	33.6357	30.2625	0.0965084		siGLI1-2	1.12679	0.225188	33.8202	30.7946	0.122805		siGLI1-2	0.649584	0.116853	33.9707	30.1709	0.0718003
siGLI1-3	0.33888	0.0442553	32.7766	22.7446	0.000955128		siGLI1-3	0.930627	0.0408993	27.4432	22.7446	0.0385098		siGLI1-3	0.328679	0.0409989	34.0628	22.848	0.000420719		siGLI1-3	0.548164	0.0677934	32.0205	22.848	0.00173295		siGLI1-3	0.102453	0.0142958	30.2138	22.848	0.00606269		siGLI1-3	0.220265	0.0912824	28.759	23.3785	0.024006		siGLI1-3	0.736541	0.0323848	26.3632	22.7446	0.0814119
	GLI1	SPP1	NES	FGF1	BCL2	IGFBP7	PLXDC1	NR2F2
siControl	1	1	1	1	1	1	1	1
siGLI1-2	0.31487	0.649584	0.241725	0.00769952	3.85627	1.6309	1.12679	0.931489
siGLI1-3	0.33888	0.736541	0.930627	0.328679	0.548164	0.102453	0.220265	1.62763
siControl	0.0438878	0.0240828	0.0680476	0.425109	0.202171	0.0268891	0.0196458	0.0516919
siGLI1-2	0.545371	0.116853	0.082662	0.013336	3.85543	0.223663	0.225188	0.0421831
siGLI1-3	0.0442553	0.0323848	0.0408993	0.0409989	0.0677934	0.0142958	0.0912824	0.0303123

## Sheet: Supplementary Fig 6e
K11 KNS
GLI1							NES							FGF1							BCL2							IGFBP7							PLXDC1							SPP1							GLI1
siControl	31.2688	24.5663	0.00960168				siControl	27.96	24.5663	0.0951514				siControl	34.4629	24.5663	0.00104917				siControl	32.9244	24.5451	0.00300324				siControl	29.9887	24.5451	0.0229776				siControl	26.5813	24.3851	0.218222				siControl	27.7866	24.854	0.130977				SPP1
	31.4977	24.5679	0.00820208					27.9343	24.5679	0.0969619					34.9018	24.5679	0.000774764					32.9522	24.5404	0.00293626					30.0708	24.5404	0.0216363					26.9638	24.238	0.151163					27.8902	24.4949	0.0950359				NES
	31.2605	24.6017	0.00989711					27.9338	24.9017	0.122247					34.6693	24.9017	0.00114723					32.7707	24.6462	0.00358315					29.9343	24.6462	0.0255922					31.9545	24.7042	0.00656804					27.9023	24.766	0.113732				FGF1
siGLI1-3	32.073	24.6071	0.00565638				siGLI1-3	29.6202	24.6071	0.0309673				siGLI1-3	35.4307	24.6071	0.0005518				siGLI1-3	35.7667	24.5274	0.000413653				siGLI1-3	33.4477	24.5274	0.00206407				siGLI1-3	29.2875	23.4567	0.0175695				siGLI1-3	28.9122	24.9739	0.0652277				BCL2
2939	32.1703	24.5684	0.00514751				2939	29.644	24.5684	0.0296538				2939	35.425	24.5684	0.000539291				2939	34.9417	24.5935	0.000767171				2939	33.7868	24.5935	0.00170822				2939	28.1522	22.6034	0.0213625				2939	29.1798	24.8952	0.0513113				IGFBP7
	32.9543	24.4289	0.00271392					29.6595	24.4289	0.0266341					36.0884	24.4289	0.000309137					35.9714	24.323	0.000311525					34.1402	24.323	0.00110849					28.8373	21.8868	0.00808506					29.2373	24.9959	0.0528702				PLXDC1
siGLI1-4	37.3228	28.6833	0.00250744				siGLI1-4	33.0246	28.6833	0.0493317				siGLI1-4	Undetermined	28.6833	0				siGLI1-4	36.7011	27.7053	0.00195891				siGLI1-4	33.9795	27.7053	0.0129203				siGLI1-4	28.6674	25.5389	0.114352				siGLI1-4	32.0939	28.1575	0.0653161
3010	37.3631	28.6666	0.00241042				3010	33.2486	28.6666	0.0417506				3010	Undetermined	28.6666	0				3010	35.6547	28.0136	0.00500967				3010	33.6147	28.0136	0.0206013				3010	29.2895	25.4901	0.0718238				3010	31.5988	28.0622	0.0861758
	36.8935	28.8	0.0036612					32.921	28.8	0.0574716					Undetermined	28.8	0					35.5647	27.7898	0.00456589					33.7751	27.7898	0.0157848					28.6897	25.3358	0.0978061					31.4787	28.3009	0.110511
siControl	1	0.133029	31.3791	24.5848	0.00900982		siControl	1	0.177649	27.9469	24.734	0.107852		siControl	1	0.197612	34.678	24.6786	0.000976985		siControl	1	0.0159498	32.9383	24.5428	0.00296956		siControl	1	0.0861752	29.9979	24.5772	0.0233453		siControl	1	0.238435	26.7725	24.4424	0.198871		siControl	1	0.223018	27.8384	24.705	0.113955
siGLI1-3	0.476279	0.174548	32.3992	24.5348	0.00429119		siGLI1-3	0.269141	0.020601	29.6412	24.5348	0.0290273		siGLI1-3	0.462059	0.139852	35.648	24.5348	0.000451425		siGLI1-3	0.155709	0.0805176	35.5599	24.4813	0.000462389		siGLI1-3	0.0674739	0.0206872	33.7916	24.4813	0.0015752		siGLI1-3	0.0727993	0.0343891	28.759	22.649	0.0144777		siGLI1-3	0.492666	0.0669085	29.1098	24.955	0.0561417
siGLI1-4	0.329717	0.0981642	37.1283	28.7333	0.00297069		siGLI1-4	0.455254	0.0728974	33.0648	28.7166	0.0490999		siGLI1-4	0	0	0	28.7166	0		siGLI1-4	1.19607	0.555049	35.9735	27.8362	0.00355181		siGLI1-4	0.6912	0.166268	33.7898	27.8362	0.0161362		siGLI1-4	0.467435	0.107798	28.8822	25.4549	0.0929592		siGLI1-4	0.749096	0.198497	31.7238	28.1735	0.0853631
	GLI1	SPP1	NES	FGF1	BCL2	IGFBP7	PLXDC1	NR2F2
siControl	1	1	1	1	1	1	1	1
siGLI1-3	0.476279	0.492666	0.269141	0.462059	0.155709	0.0674739	0.0727993	0.375175
siGLI1-4	0.329717	0.749096	0.455254	0	1.19607	0.6912	0.467435	0.219288
siControl	0.133029	0.113955	0.177649	0.197612	0.0159498	0.0861752	0.238435	0.138299
siGLI1-3	0.174548	0.0561417	0.020601	0.139852	0.0805176	0.0206872	0.0343891	0.206372
siGLI1-4	0.0981642	0.0853631	0.0728974	0	0.555049	0.166268	0.107798	0.0304179
K11 KMS
GLI1							NES							FGF1							BCL2							IGFBP7							PLXDC1							SPP1							GLI1
siControl	32.2541	25.2438	0.0077569				siControl	28.7187	25.2438	0.0899417				siControl	36.28	25.2438	0.000476191				siControl	32.7606	25.8982	0.00859434				siControl	32.1745	26.621	0.0212916				siControl	26.5813	24.3851	0.218222				siControl	30.9418	25.8982	0.0303193				SPP1
	32.545	25.5934	0.00807915					28.6762	25.5934	0.118029					35.9522	25.5934	0.000761545					33.5336	25.9395	0.00517562					32.0403	26.4912	0.0213576					26.9638	24.238	0.151163					28.9242	25.9395	0.126333				NES
	33.0663	25.9661	0.00728797					28.6481	25.9661	0.155823					37.9404	25.9661	0.000248514					33.9376	25.9652	0.00398166					31.94	26.5247	0.0234332					31.9545	24.7042	0.00656804					29.0731	25.9652	0.115997				FGF1
siGLI1-1	37.9641	27.4703	0.000693473				siGLI1-1	31.9899	27.4703	0.0435974				siGLI1-1	36.2124	27.4703	0.00233534				siGLI1-1	36.4288	28.3615	0.00372811				siGLI1-1	33.684	29.4344	0.0525704				siGLI1-1	29.7335	26.0609	0.0784266				siGLI1-1	30.5408	28.3615	0.220779				BCL2
194	36.3355	27.3303	0.00194604				194	32.1118	27.3303	0.0363606				194	37.2309	27.3303	0.00104619				194	Undetermined	28.2984	#VALUE!				194	33.8165	29.4484	0.0484255				194	31.7873	26.9422	0.0347922				194	31.5039	28.2984	0.108409				IGFBP7
	37.8432	26.8974	0.00050698					31.5623	26.8974	0.0394221					37.2309	26.8974	0.000774987					37.0081	28.204	0.00223712					33.7564	29.3453	0.0470014					30.5471	25.2266	0.0250239					30.5031	28.204	0.203183				PLXDC1
siGLI1-3	32.1805	23.1242	0.00187838				siGLI1-3	28.5716	23.1242	0.0229168				siGLI1-3	34.9303	23.1242	0.00027926				siGLI1-3	34.4277	24.6492	0.0011386				siGLI1-3	33.6195	24.9484	0.00245333				siGLI1-3	29.2875	23.4567	0.0175695				siGLI1-3	27.0984	24.6492	0.183118
2939	31.6787	22.8228	0.00215837				2939	28.4617	22.8228	0.0200697				2939	34.6968	22.8228	0.000266428				2939	33.5162	24.3844	0.00178264				2939	33.6305	24.9552	0.00244611				2939	28.1522	22.6034	0.0213625				2939	26.9989	24.3844	0.163287
	31.4707	22.6833	0.00226332					28.1199	22.6833	0.0230899					34.1351	22.6833	0.000357003					34.181	24.3741	0.00111646					33.4541	24.9627	0.00277876					28.8373	21.8868	0.00808506					26.6538	24.3741	0.205937
siControl	1	0.0729083	32.8057	25.7797	0.00767337		siControl	1	0.393506	28.6834	25.6049	0.118385		siControl	1	0.335065	36.1161	25.4186	0.000602197		siControl	1	0.362461	33.1471	25.9189	0.00666941		siControl	1	0.0553417	32.0516	26.5456	0.0220055		siControl	1	0.238435	26.7725	24.4424	0.198871		siControl	1	0.0603758	28.9987	25.9524	0.121055
siGLI1-1	0.114834	0.101986	37.381	27.2327	0.000881165		siGLI1-1	0.335208	0.0432249	31.888	27.2327	0.0396836		siGLI1-1	1.49525	0.318447	37.2309	27.1139	0.000900434		siGLI1-1	0.434589	0.158078	36.7185	28.288	0.00289845		siGLI1-1	2.23929	0.488501	33.7523	29.4093	0.0492767		siGLI1-1	0.205524	0.265293	30.6893	26.0766	0.0408727		siGLI1-1	1.39955	0.746222	30.8493	28.288	0.169422
siGLI1-3	0.272834	0.0259328	31.7766	22.8768	0.00209356		siGLI1-3	0.18567	0.0143257	28.3844	22.8768	0.0219806		siGLI1-3	0.495467	0.081387	34.5874	22.8768	0.000298369		siGLI1-3	0.196942	0.0567358	34.0416	24.4692	0.00131349		siGLI1-3	0.116099	0.00863449	33.568	24.9555	0.00255482		siGLI1-3	0.0727993	0.0343891	28.759	22.649	0.0144777		siGLI1-3	1.51411	0.176305	26.917	24.4692	0.18329
	GLI1	SPP1	NES	FGF1	BCL2	IGFBP7	PLXDC1	NR2F2
siControl	1	1	1	1	1	1	1	1
siGLI1-1	0.114834	1.39955	0.335208	1.49525	0.434589	2.23929	0.205524	0.501907
siGLI1-3	0.272834	1.51411	0.18567	0.495467	0.196942	0.116099	0.0727993	0.882478
siControl	0.0729083	0.121055	0.393506	0.335065	0.362461	0.0553417	0.238435	0.0989674
siGLI1-1	0.101986	0.169422	0.0432249	0.318447	0.158078	0.488501	0.265293	0.213971
siGLI1-3	0.0259328	0.18329	0.0143257	0.081387	0.0567358	0.00863449	0.0343891	0.0396296
K11 KCS
GLI1							NES							FGF1							BCL2							IGFBP7							PLXDC1							SPP1							GLI1
siControl	35.4249	25.1398	0.000801454				siControl	28.8618	25.1398	0.0757821				siControl	32.3392	24.69	0.00498147				siControl	31.0114	25.1304	0.0169684				siControl	29.0823	25.1398	0.0650411				siControl	28.4106	25.1304	0.102935				siControl	28.1582	25.1398	0.123418				SPP1
	33.8202	25.1834	0.00251238					29.0291	25.1834	0.0695548					31.9076	24.7637	0.00707095					30.8056	25.1991	0.0205246					28.9345	25.1834	0.0742694					28.4098	25.1991	0.10801					28.2339	25.1834	0.120701				NES
	34.8185	25.2102	0.00128112					29.039	25.2102	0.070371					32.0589	24.7971	0.00651634					30.7101	25.2612	0.0228941					28.8888	25.2102	0.078097					28.5068	25.2612	0.105431					28.2488	25.2102	0.121698				FGF1
siGLI1-2	0	35.886	0				siGLI1-2	Undetermined	35.886	0				siGLI1-2	Undetermined	37.9711	#VALUE!				siGLI1-2	Undetermined	35.0869	0				siGLI1-2	Undetermined	35.886	0				siGLI1-2	Undetermined	35.0869	#VALUE!				siGLI1-2	0	35.886	0				BCL2
1091	0	34.953	0				1091	Undetermined	34.953	0				1091	Undetermined	36.2537	#VALUE!				1091	39.9663	35.8759	0.0587048				1091	37.2658	34.953	0.20127				1091	Undetermined	35.8759	#VALUE!				1091	0	34.953	0				IGFBP7
	0	35.6853	0					Undetermined	35.6853	0					Undetermined	35.5144	#VALUE!					35.1529	35.9797	1.77376					38.6827	35.6853	0.125222					Undetermined	35.9797	#VALUE!					0	35.6853	0				PLXDC1
siGLI1-3	39.724	29.7801	0.00101533				siGLI1-3	37.3371	29.7801	0.00531048				siGLI1-3	Undetermined	30.1079	#VALUE!				siGLI1-3	35.3278	29.8151	0.0219033				siGLI1-3	36.0645	29.7801	0.0128301				siGLI1-3	35.3697	29.8151	0.0212765				siGLI1-3	36.6662	29.7801	0.00845465				NR2F2
2939	42.9345	29.8497	0.000115097				2939	35.9644	29.8497	0.0144305				2939	Undetermined	30.1213	#VALUE!				2939	35.3695	30.0341	0.0247689				2939	36.125	29.8497	0.01291				2939	35.425	30.0341	0.0238326				2939	36.3882	29.8497	0.0107574
	0	29.9443	0					38.0826	29.9443	0.00354931					Undetermined	30.1627	#VALUE!					35.6788	29.9855	0.0193258					36.7525	29.9443	0.00892367					34.905	29.9855	0.0330423					35.3042	29.9443	0.0243505
siControl	1	0.00179406					siControl	1	0.0730265					siControl	1	0.00593495					siControl	1	0.134746	30.9085	25.1647	0.018662		siControl	1	0.0928849	28.9685	25.1778	0.0722566		siControl	1	0.0332825	28.4102	25.1969	0.107818		siControl	1	0.00581944	28.2414	25.1968	0.121199
siGLI1-2	0	0					siGLI1-2	0	0					siGLI1-2	0	0					siGLI1-2	1.57285	2.22434	37.5596	35.6475	0.0293524		siGLI1-2	2.50455	0.744211	37.9743	35.5081	0.18097		siGLI1-2	0	#DIV/0!	#DIV/0!	35.6475	#DIV/0!		siGLI1-2	0	#DIV/0!	0	35.5081	0
siGLI1-3	0.210032	0.000376811					siGLI1-3	0.0887237	0.00647918					siGLI1-3	0	0					siGLI1-3	1.17281	0.145904	35.4587	29.9449	0.0218869		siGLI1-3	0.157648	0.0315374	36.314	29.858	0.0113911		siGLI1-3	0.237331	0.0573976	35.2333	29.9449	0.0255886		siGLI1-3	0.107549	0.0708773	36.1195	29.858	0.0130348
	GLI1	SPP1	NES	FGF1	BCL2	IGFBP7	PLXDC1	NR2F2
siControl	1	1	1	1	1	1	1	1
siGLI1-2	0	0	0	0	1.57285	2.50455	0	0.0987636
siGLI1-3	0.210032	0.107549	0.0887237	0	1.17281	0.157648	0.237331	0.708739
siControl	0.485281	0.121199	0.0523952	0.248946	0.134746	0.0928849	0.0332825	0.0140363
siGLI1-2	0	0	#DIV/0!	#DIV/0!	2.22434	0.744211	#DIV/0!	0.171064
siGLI1-3	0.309891	0.0130348	0.0799796	#DIV/0!	0.145904	0.0315374	0.0573976	0.0290657
[truncated: 1 more columns]

## Sheet: Supplementary Fig 6f
K9 KNS
GLI1							SPP1							NES							IGFBP7							BCL2							PLXDC1							FGF1							GLI1
siControl	31.4464	24.8628	0.0104264				siControl	24.9122	24.8628	0.966338				siControl	27.4778	24.8628	0.163225				siControl	38.0937	32.9421	0.0281343				siControl	38.1475	32.9421	0.027104				siControl	36.1516	33.0307	0.114954				siControl	30.9795	21.2792	0.00120206				SPP1
	31.361	24.9208	0.0115162					24.8523	24.9208	1.04859					27.57	24.9208	0.159409					37.4634	32.9727	0.0444793					38.9363	32.9727	0.016024					35.7923	32.9811	0.142478					30.9672	21.3603	0.00128247				NES
	31.4638	24.9373	0.0108469					24.8651	24.9373	1.05128					27.4816	24.9373	0.171427					37.9368	32.8575	0.0295801					Undetermined	32.8575	#VALUE!					35.5826	32.6201	0.128285					30.964	21.2759	0.00121218				FGF1
siGLI1-1	35.664	25.5165	0.000881656				siGLI1-1	29.2979	25.5165	0.0727224				siGLI1-1	30.3043	25.5165	0.0362002				siGLI1-1	29.9672	24.9393	0.0306506				siGLI1-1	30.9773	24.9393	0.0152186				siGLI1-1	28.1796	24.9437	0.106143				siGLI1-1	Undetermined	25.5257	0				BCL2
194	37.59	25.4856	0.000227106				194	29.3456	25.4856	0.068871				194	30.1321	25.4856	0.0399271				194	29.8837	24.9359	0.0324007				194	30.6891	24.9359	0.0185398				194	28.0622	24.961	0.116535				194	Undetermined	25.5491	0				IGFBP7
	35.3282	25.6093	0.00118667					29.2149	25.6093	0.0821493					30.147	25.6093	0.0430524					29.9422	24.936	0.0311161					30.805	24.936	0.0171106					28.1113	24.9246	0.109824					39.1571	25.5327	7.9187e-05				PLXDC1
siGLI1-3	36.9333	24.5	0.0001808				siGLI1-3	29.9139	24.5	0.0234558				siGLI1-3	28.9797	24.5	0.0448221				siGLI1-3	29.9631	23.2485	0.00952157				siGLI1-3	31.404	23.2485	0.003507				siGLI1-3	29.0643	23.3797	0.0194429				siGLI1-3	35.3676	23.5912	0.000285061
2939	35.6364	24.6281	0.000485482				2939	29.9103	24.6281	0.0256986				2939	28.9154	24.6281	0.051217				2939	30.035	23.3684	0.00984324				2939	31.2375	23.3684	0.00427704				2939	28.8233	23.4593	0.0242805				2939	35.4913	23.5529	0.000254783
	36.1303	24.702	0.00036285					30.0777	24.702	0.0240848					28.9301	24.702	0.0533591					29.9637	23.3745	0.0103864					30.9523	23.3745	0.00523437					28.761	23.4396	0.0250083					36.3658	23.517	0.000135566
siControl	1	0.0503245	31.4237	24.9069	0.0109207		siControl	1	0.0472774	24.8765	24.9069	1.0213		siControl	1	0.0373072	27.5098	24.9069	0.164611		siControl	1	0.2715	37.8313	32.9241	0.0333271		siControl	1	0.384721	38.5419	32.9241	0.0203648		siControl	1	0.166257	35.9719	32.8773	0.117063		siControl	1	0.0462645	30.9733	21.3051	0.00122909
siGLI1-1	0.0567155	0.0448942	36.194	25.5371	0.000619373		siGLI1-1	0.0728257	0.00668903	29.2861	25.5371	0.0743766		siGLI1-1	0.240731	0.02084	30.1945	25.5371	0.0396271		siGLI1-1	0.941589	0.0271974	29.931	24.9371	0.0313805		siGLI1-1	0.829917	0.081805	30.8238	24.9371	0.0169011		siGLI1-1	0.946082	0.0450134	28.1177	24.9431	0.110751		siGLI1-1	0.0645685	0.0371973	39.1571	25.5358	7.93602e-05
siGLI1-3	0.0290257	0.0140379	36.2334	24.61	0.000316981		siGLI1-3	0.0238863	0.00113278	29.9673	24.61	0.024395		siGLI1-3	0.301702	0.0269822	28.9417	24.61	0.0496636		siGLI1-3	0.297376	0.0131161	29.9873	23.3305	0.0099107		siGLI1-3	0.210265	0.0424937	31.198	23.3305	0.00428201		siGLI1-3	0.194513	0.0258414	28.8829	23.4262	0.0227702		siGLI1-3	0.174383	0.064303	35.7416	23.5537	0.000214332
	GLI1	SPP1	NES	FGF1	BCL2	IGFBP7	PLXDC1	NR2F2
siControl	1	1	1	1	1	1	1	1
siGLI1-1	0.0567155	0.0728257	0.240731	0.0645685	0.829917	0.941589	0.946082	2.41475
siGLI1-3	0.0290257	0.0238863	0.301702	0.174383	0.210265	0.297376	0.194513	3.4829
siControl	0.0503245	0.0472774	0.0373072	0.0462645	0.384721	0.2715	0.117063	0.0164754
siGLI1-1	0.0448942	0.00668903	0.02084	0.0371973	0.081805	0.0271974	0.110751	0.0397839
siGLI1-3	0.0140379	0.00113278	0.0269822	0.064303	0.0424937	0.0131161	0.0227702	0.0573822
K9 KMS
GLI1							SPP1							NES							IGFBP7							BCL2							PLXDC1							FGF1							GLI1
siControl	37.5818	30.9928	0.0103879				siControl	36.6843	33.9507	0.150347				siControl	39.9443	33.9507	0.0156946				siControl	36.9557	30.8202	0.0142244				siControl	28.9406	21.955	0.0078905				siControl	35.9711	30.8202	0.0281466				siControl	31.8967	21.8044	0.000916043				SPP1
	38.1559	31.0218	0.00711887					36.7403	33.7644	0.127102					38.8497	33.7644	0.0294554					35.8029	30.8367	0.0319917					29.1768	21.3517	0.00440985					36.3606	30.8367	0.0217339					31.3413	21.6454	0.00120573				NES
	37.6926	31.1532	0.0107503					36.9631	34.012	0.129308					38.5561	34.012	0.0428623					35.9075	30.9463	0.0321021					29.111	20.7958	0.00313957					36.9622	30.9463	0.015454					31.2995	21.4004	0.00104729				FGF1
siGLI1-3	31.3106	20.8138	0.000692068				siGLI1-3	27.8374	22.3974	0.0230357				siGLI1-3	27.8838	22.3974	0.0223062				siGLI1-3	28.3745	21.4355	0.00814956				siGLI1-3	30.5708	22.9851	0.00520584				siGLI1-3	26.4889	21.4355	0.0301135				siGLI1-3	34.0532	22.3974	0.000309908				BCL2
2939	31.4668	20.7775	0.00060562				2939	27.9381	21.572	0.0121228				2939	27.9292	21.572	0.0121979				2939	27.9862	21.2414	0.00932399				2939	30.678	22.2323	0.00286819				2939	26.6059	21.2414	0.0242722				2939	34.0513	21.572	0.000175123				IGFBP7
	31.4014	20.7157	0.000607098					27.913	22.1594	0.0185356					27.6619	22.1594	0.0220592					27.8801	21.8787	0.0156104					30.3933	21.4798	0.00207389					26.5012	21.8787	0.0405972					35.5112	22.1594	9.56533e-05				PLXDC1
siGLI1-4	Undetermined	33.5636	#VALUE!				siGLI1-4	39.7686	34.8818	0				siGLI1-4	Undetermined	34.8818	0				siGLI1-4	38.6954	31.5886	0.00725507				siGLI1-4	Undetermined	31.0665	0				siGLI1-4	38.4514	31.5886	0.00859179				siGLI1-4	Undetermined	31.9092	0
3010	Undetermined	33.6421	#VALUE!				3010	Undetermined	36.0229	0				3010	38.8886	36.0229	0.137194				3010	38.3808	31.4513	0				3010	Undetermined	30.9011	0				3010	38.1393	31.4513	0.00969894				3010	Undetermined	32.1975	#VALUE!
	Undetermined	33.9523	#VALUE!					Undetermined	34.4587	0					Undetermined	34.4587	#VALUE!					41.0186	31.5149	0					38.3704	30.5369	0.00438409					Undetermined	31.5149	0					Undetermined	31.771	#VALUE!
siControl	1	0.21592	37.8101	31.0559	0.00926375		siControl	1	0.0949107	36.7959	33.909	0.135194		siControl	1	0.502002	39.1167	33.909	0.0270601		siControl	1	0.420931	36.222	30.8677	0.0244457		siControl	1	0.508663	29.0587	21.3675	0.00483855		siControl	1	0.178411	36.1659	30.8677	0.0254158		siControl	1	0.138184	31.5125	21.6168	0.00104973
siGLI1-3	0.0684041	0.00534226	31.3929	20.769	0.000633679		siGLI1-3	0.127952	0.0405662	27.8961	22.0429	0.0172983		siGLI1-3	0.671589	0.213084	27.825	22.0429	0.0181733		siGLI1-3	0.433027	0.164107	28.0803	21.5185	0.0105856		siGLI1-3	0.649003	0.336489	30.5473	22.2324	0.00314023		siGLI1-3	1.21811	0.325459	26.532	21.5185	0.0309591		siGLI1-3	0.164948	0.10318	34.5386	22.0429	0.000173151
siGLI1-4	0	#DIV/0!	#DIV/0!	33.7193	0		siGLI1-4	0	#DIV/0!	#DIV/0!	35.1211	0		siGLI1-4	0	#DIV/0!	38.8886	35.1211	0		siGLI1-4	0.0989278	0.171348	39.3649	31.5183	0.00241836		siGLI1-4	0.302025	0.523122	38.3704	30.8349	0.00146136		siGLI1-4	0.239886	0.208886	38.2953	31.5183	0.00609691		siGLI1-4	0	#DIV/0!	#DIV/0!	31.9592	0
	GLI1	SPP1	NES	FGF1	BCL2	IGFBP7	PLXDC1	NR2F2
siControl	1	1	1	1	1	1	1	1
siGLI1-3	0.0684041	0.127952	0.671589	0.164948	0.649003	0.433027	1.21811	7.10372
siGLI1-4	0	0	0	0	0.302025	0.0989278	0.239886	0.468488
siControl	0.21592	0.0949107	0.502002	0.138184	0.508663	0.420931	0.0254158	0.00495831
siGLI1-3	0.00534226	#REF!	0.213084	0.10318	0.336489	0.164107	0.0309591	0.0352224
siGLI1-4	#DIV/0!	#DIV/0!	#DIV/0!	#DIV/0!	0.523122	0.171348	0.00609691	0.00232291
K9 KCS
GLI1							SPP1							NES							IGFBP7							BCL2							PLXDC1							FGF1							GLI1
siControl	32.1813	24.9619	0.00671043				siControl	27.9701	24.9619	0.124286				siControl	28.907	24.9619	0.0649242				siControl	27.8764	25.332	0.17142				siControl	34.4031	25.2596	0.00176827				siControl	28.4398	25.332	0.115994				siControl	34.4245	25.332	0.00183181				SPP1
	32.4388	24.874	0.00528152					27.9309	24.874	0.120167					28.9294	24.874	0.0601441					27.8538	25.3068	0.171112					34.6785	24.9116	0.00114783					28.4582	25.3068	0.112545					33.866	25.3068	0.00265095				NES
	31.9557	24.9133	0.00758625					27.9573	24.9133	0.121247					28.885	24.9133	0.063738					27.6853	25.1587	0.173546					34.293	25.4039	0.00210921					28.4145	25.1587	0.104685					34.2231	25.1587	0.00186787				FGF1
siGLI1-3	36.876	26.6787	0.000851731				siGLI1-3	31.8964	26.6787	0.0268728				siGLI1-3	31.0938	26.6787	0.046871				siGLI1-3	32.0951	27.6177	0.0448926				siGLI1-3	34.9767	27.513	0.00566519				siGLI1-3	31.9013	27.6177	0.051347				siGLI1-3	Undetermined	27.6177	0				BCL2
2939	35.4876	26.695	0.0022551				2939	31.9204	26.695	0.0267306				2939	31.0611	26.695	0.0484929				2939	31.9985	27.265	0.03759				2939	34.0023	27.2658	0.00937806				2939	31.8786	27.265	0.0408475				2939	39.7591	27.265	0.000173341				IGFBP7
	35.9584	26.7665	0.00170987					31.8444	26.7665	0.0296071					31.1982	26.7665	0.0463367					31.992	27.937	0.0601609					34.8246	26.5019	0.00312337					31.376	27.937	0.0922015					Undetermined	27.937	0				PLXDC1
siGLI1-4	Undetermined	36.6622	0				siGLI1-4	Undetermined	36.6622	0				siGLI1-4	Undetermined	36.6622	0				siGLI1-4	Undetermined	38.1755	#VALUE!				siGLI1-4	Undetermined	34.6329	0				siGLI1-4	Undetermined	38.1755	0				siGLI1-4	Undetermined	38.1755	0				NR2F2
3010	Undetermined	36.2463	0				3010	39.6245	36.2463	0.0961794				3010	Undetermined	36.2463	0				3010	Undetermined	36.1742	0				3010	Undetermined	35.6021	0				3010	38.602	36.1742	0				3010	Undetermined	36.1742	0
	45.9756	36.1296	0.00108652					Undetermined	36.1296	0					Undetermined	36.1296	0					Undetermined	38.4764	0					Undetermined	34.3535	0					Undetermined	38.4764	#VALUE!					Undetermined	38.4764	0
siControl	1	0.180249	32.1919	24.9164	0.00645425		siControl	1	0.017521	27.9528	24.9164	0.121888		siControl	1	0.0395702	28.9071	24.9164	0.0629022		siControl	1	0.00770331	27.8051	25.2658	0.172022		siControl	1	0.28611	34.5408	25.1917	0.00153337		siControl	1	0.0221586	28.449	25.2658	0.110092		siControl	1	0.221947	34.1712	25.2658	0.0020855
siGLI1-3	0.230302	0.109614	36.1073	26.7134	0.00148643		siGLI1-3	0.227307	0.0133009	31.8871	26.7134	0.0277059		siGLI1-3	0.750764	0.017851	31.1177	26.7134	0.0472247		siGLI1-3	0.271187	0.0669526	32.0285	27.6066	0.0466502		siGLI1-3	3.58374	2.05141	34.6012	27.0936	0.0054952		siGLI1-3	0.525272	0.24644	31.7187	27.6066	0.0578282		siGLI1-3	0.105322	0.047988	39.7591	27.6066	0.000219648
siGLI1-4	0.056114	0.0971922	45.9756	36.346	0.000362173		siGLI1-4	0.263027	0.455576	39.6245	36.346	0.0320598		siGLI1-4	0	#DIV/0!	#DIV/0!	36.346	0		siGLI1-4	#VALUE!	#VALUE!	#DIV/0!	37.6087	#VALUE!		siGLI1-4	0	#DIV/0!	#DIV/0!	34.8628	0		siGLI1-4	#VALUE!	#VALUE!	38.602	37.6087	#VALUE!		siGLI1-4	0	#DIV/0!	#DIV/0!	37.6087	0
	GLI1	SPP1	NES	FGF1	BCL2	IGFBP7	PLXDC1	NR2F2
siControl	1	1	1	1	1	1	1	1
siGLI1-3	0.230302	0.227307	0.750764	0.105322	3.58374	0.271187	0.525272	2.05856
siGLI1-4	0.056114	0.263027	0	0	0	0	0	0
siControl	0.180249	0.017521	0.0395702	0.221947	0.28611	0.00770331	0.110092	0.0405198
siGLI1-3	0.109614	0.0133009	0.017851	0.047988	2.05141	0.0669526	0.0578282	0.0834126
siGLI1-4	0.0971922	0.455576	#DIV/0!	#DIV/0!	#DIV/0!	#VALUE!	#VALUE!	#VALUE!
[truncated: 1 more columns]

## Sheet: Supplementary Fig 6g
K14
	IGFBP7	ACTB	ΔΔCT			FGF1	ACTB	ΔΔCT			PLXDC1	ACTB	ΔΔCT			NR2F2	ACTB	ΔΔCT
KNS	29.309	25.7075	0.0823836		KNS	33.9982	25.8978	0.00364386		KNS	28.9231	25.8978	0.122829		KNS	30.9347	25.8978	0.0304616
	29.4275	25.7309	0.0771269			34.0521	25.7751	0.0032239			28.9037	25.7751	0.114347			30.979	25.7751	0.0271318
	29.2429	25.833	0.094086			33.3753	25.4162	0.00401862			28.6224	25.4162	0.10835			30.8627	25.4162	0.0229315
KNS+Vismodegib	28.6197	24.6404	0.0634037		KNS+Vismodegib	33.8877	24.3351	0.0013317		KNS+Vismodegib	28.4992	24.3351	0.0557834		KNS+Vismodegib	28.9195	24.3351	0.0416852
	28.7109	24.6558	0.0601567			33.4207	24.8133	0.00256407			28.5127	24.8133	0.0769791			28.9357	24.8133	0.0574174
	28.7201	24.5322	0.0548657			33.5565	24.3273	0.00166624			28.8554	24.3273	0.0433401			28.4586	24.3273	0.0570614
KPS	28.1245	24.7368	0.0955431		KPS	32.3094	24.6443	0.00492678		KPS	28.9988	24.6443	0.0488835		KPS	30.4376	24.6443	0.0180314
	28.3091	24.6808	0.0808683			32.4192	24.6397	0.0045515			28.9458	24.6397	0.050553			30.5444	24.6397	0.0166926
	28.261	24.9534	0.100997			32.1115	24.7814	0.00621495			28.9299	24.7814	0.0563887			30.5514	24.7814	0.0183265
KPS+Vismodegib	27.43	24.3004	0.114258		KPS+Vismodegib	31.7404	24.5337	0.00676966		KPS+Vismodegib	27.9728	24.5337	0.0921976		KPS+Vismodegib	29.3562	24.5337	0.0353405
	27.5313	24.1935	0.0989027			32.2187	24.3766	0.00435801			28.6222	24.3766	0.0527161			29.2976	24.3766	0.0330076
	27.7739	24.2838	0.088999			32.14	24.1611	0.003964			28.5728	24.1611	0.0469838			29.7095	24.1611	0.0213688
KCS	27.9362	24.0079	0.0656855		KCS	33.4551	24.0424	0.00146721		KCS	28.2953	24.0424	0.0524516		KCS	28.7591	24.0424	0.0380314
	27.6908	24.009	0.0779272			33.3156	23.8691	0.00143325			28.3209	23.8691	0.0456941			28.4732	23.8691	0.0411175
	27.752	24.0559	0.077159			33.515	24.0854	0.00145005			28.4639	24.0854	0.0480755			29.0422	24.0854	0.0321999
KCS+Vismodegib	27.6071	23.4745	0.0570139		KCS+Vismodegib	33.053	23.7618	0.00159622		KCS+Vismodegib	27.9321	23.7618	0.0555437		KCS+Vismodegib	28.547	23.7618	0.036268
	27.4423	23.8437	0.0825532			32.9199	23.9525	0.0019978			28.0015	23.9525	0.0604159			28.493	23.9525	0.042972
	27.5301	23.7881	0.074739			33.0373	23.7394	0.00158873			28.0415	23.7394	0.0506927			28.4235	23.7394	0.0388999
IGFBP7 expression (average)					FGF1 expression (average)					PLXDC1 expression (average)					NR2F2 expression (average)
Expression (average)	KNS	KPS	KCS		Expression (average)	KNS	KPS	KCS		Expression (average)	KNS	KPS	KCS		Expression (average)	KNS	KPS	KCS
Mock	0.0845321	0.0924693	0.0735906		Mock	0.00362879	0.00523108	0.00145017		Mock	0.115176	0.0519417	0.0487404		Mock	0.0268417	0.0176835	0.0371162
Vismodegib	0.0594754	0.10072	0.0714354		Vismodegib	0.001854	0.00503056	0.00172758		Vismodegib	0.0587009	0.0639658	0.0555508		Vismodegib	0.0520547	0.0299057	0.0393799
Relative expression (average)	KNS	KPS	KCS		Relative expression (average)	KNS	KPS	KCS		Relative expression (average)	KNS	KPS	KCS		Relative expression (average)	KNS	KPS	KCS
Mock	1	1	1		Mock	1	1	1		Mock	1	1	1		Mock	1	1	1
Vismodegib	0.703583	1.08923	0.970714		Vismodegib	0.510914	0.961668	1.1913		Vismodegib	0.509664	1.23149	1.13973		Vismodegib	1.93933	1.69116	1.06099
S.D.	KNS	KPS	KCS		S.D.	KNS	KPS	KCS		S.D.	KNS	KPS	KCS		S.D.	KNS	KPS	KCS
Mock	0.102699	0.112581	0.0931747		Mock	0.109561	0.166787	0.00819402		Mock	0.0631629	0.0758656	0.0345492		Mock	0.140581	0.0492395	0.16989
Vismodegib	0.0509815	0.137638	0.177825		Vismodegib	0.175618	0.290368	0.161392		Vismodegib	0.147672	0.473932	0.0997451		Vismodegib	0.334629	0.423251	0.0910026
t-Test: Two-tailed test					t-Test: Two-tailed test					t-Test: Two-tailed test
KNS(DMSO–Vismodegib)					KNS(DMSO–Vismodegib)					KNS(DMSO–Vismodegib)
	#1	#2				#1	#2				#1	#2
Average	0.0845321	0.0594754			Average	0.00362879	0.001854			Average	0.115176	0.0587009
Variance	7.53656e-05	1.85725e-05			Variance	1.58066e-07	4.06129e-07			Variance	5.29231e-05	0.000289279
Number of observation	3	3			Number of observation	3	3			Number of observation	3	3
Difference from statistical hypothesis average	0				Difference from statistical hypothesis average	0				Difference from statistical hypothesis average	0
Degree of freedom	3				Degree of freedom	3				Degree of freedom	3
t	4.47781				t	4.09254				t	5.28779
P(T<=t) One-tail	0.0103822				P(T<=t) One-tail	0.0131883				P(T<=t) One-tail	0.00659703
t boundary value One-tail	2.35336				t boundary value One-tail	2.35336				t boundary value One-tail	2.35336
P(T<=t) Two-tail	0.0207644				P(T<=t) Two-tail	0.0263766				P(T<=t) Two-tail	0.0131941
t boundary value One-tail	3.18245				t boundary value One-tail	3.18245				t boundary value One-tail	3.18245
GLI1
	DMSO	ACTB		VIS	ACTB
Keloid Normal Sphere	34.0352	24.7484	0.00160108	35.422	25.2204	0.000849231
	34.6134	25.5844	0.00191427	35.8171	25.2166	0.000644072
	34.4015	24.6466	0.00115746	35.9792	24.5684	0.000367288
Keloid Peripheral Sphere	33.9662	24.4821	0.00139635	35.7577	24.4083	0.000383248
	33.7984	24.6768	0.00179516	35.7453	24.7278	0.000482385
	34.1735	24.4245	0.00116211	36.2335	24.9775	0.000408898
Keloid Center Sphere	33.3318	23.6164	0.00118953	36.571	24.207	0.000189706
	33.2492	23.5646	0.00121521	35.9587	24.9722	0.000492859
	33.0455	22.964	0.000922901	34.7003	23.9722	0.000589532
		Relative expression	S.D.	Expression (average)
	Keloid Normal Sphere DMSO	1	0.0015576	0.24414
	Keloid Normal Sphere VIS	0.398174	0.000620197	0.155275
	Keloid Peripheral Sphere DMSO	1	0.00145121	0.220552
	Keloid Peripheral Sphere VIS	0.292752	0.000424843	0.0354575
	Keloid Center Sphere DMSO	1	0.00110921	0.145923
	Keloid Center Sphere VIS	0.382283	0.000424032	0.188071
		DMSO	Vismodegib
	Keloid Normal Sphere	1	0.398174
	Keloid Peripheral Sphere	1	0.292752
	Keloid Center Sphere	1	0.382283
	Keloid Normal Sphere	0.24414	0.155275
	Keloid Peripheral Sphere	0.220552	0.0354575
	Keloid Center Sphere	0.145923	0.188071
t-Test: Two-tailed test			t-Test: Two-tailed test			t-Test: Two-tailed test
KNS(DMSO–Vismodegib)			KPS(DMSO–Vismodegib)			KCS(DMSO–Vismodegib)
	#1	#2		#1	#2		#1	#2
Average	0.0015576	0.000620197	Average	0.00145121	0.000424843	Average	0.00110921	0.000424032
Variance	1.44607e-07	5.84947e-08	Variance	1.02443e-07	2.64773e-09	Variance	2.61987e-08	4.35182e-08
Number of observation	3	3	Number of observation	3	3	Number of observation	3	3
Difference from statistical hypothesis average	0		Difference from statistical hypothesis average	0		Difference from statistical hypothesis average	0
Degree of freedom	3		Degree of freedom	2		Degree of freedom	4
t	3.60273		t	5.48377		t	4.49465
P(T<=t) One-tail	0.0183458		P(T<=t) One-tail	0.015841		P(T<=t) One-tail	0.00543349
t boundary value One-tail	2.35336		t boundary value One-tail	2.91999		t boundary value One-tail	2.13185
P(T<=t) Two-tail	0.0366915		P(T<=t) Two-tail	0.0316819		P(T<=t) Two-tail	0.010867
t boundary value One-tail	3.18245		t boundary value One-tail	4.30265		t boundary value One-tail	2.77645

[truncated: 8 more sheets: Supplementary Fig 7a, Supplementary Fig 7b, Supplementary Fig 7c, Supplementary Fig 7d, Supplementary Fig 7f, Supplementary Fig 7g, Supplementary Fig 7h, Supplementary Fig 9c]
